# 1 Platelet HMGB1 in Platelet-Rich Plasma Promotes Tendon Wound Healing

2  
3  
4 Jianying Zhang<sup>1</sup>, Feng Li<sup>1</sup>, Tyler Augi<sup>1</sup>, Kelly M. Williamson<sup>1</sup>, Kentaro Onishi<sup>1,3</sup>, MaCalus V.  
5 Hogan<sup>1,2,3</sup>, Matthew D. Neal<sup>4</sup>, James H-C. Wang<sup>1,2,3#</sup>  
6  
7

8 <sup>1</sup>MechanoBiology Laboratory, Department of Orthopaedic Surgery,

9 <sup>2</sup>Department of Bioengineering,

10 <sup>3</sup>Department of Physical Medicine and Rehabilitation,

11 <sup>4</sup>Department of Surgery,

12 University of Pittsburgh, Pittsburgh, PA15213  
13  
14  
15  
16  
17  
18  
19  
20  
21  
22  
23  
24  
25  
26  
27  
28  
29  
30

## 31 #Correspondence:

32  
33 James H-C. Wang, PhD

34 MechanoBiology Laboratory

35 Department of Orthopaedic Surgery

36 University of Pittsburgh School of Medicine

37 E1640 BST, 200 Lothrop Street

38 Pittsburgh, PA15213

39 Tel. 412-648-9102

40 Fax: 412-648-8548

41 Email: [wanghc@pitt.edu](mailto:wanghc@pitt.edu)  
42  
43

44 **Short Title:** Platelet HMGB1 Promotes Tendon Healing  
45  
46

47 **Abstract**

48  
49 Platelet-rich plasma (PRP) is a widely used autologous treatment for tendon injuries in clinics,  
50 but clinical trials often produce conflicting results. Platelets (PLTs) are a major source of high  
51 mobility group box 1 (HMGB1) that is gaining attention as a chemoattractant that can recruit  
52 stem cells to the wound area to enhance healing; however, the contribution of PLT HMGB1 in  
53 wounded tendon healing remains unexplored. This study investigated the effect of PLT HMGB1  
54 within PRP to enhance healing in an acute patellar tendon injury model in PLT HMGB1  
55 knockout (KO) mice and GFP mice. A window defect was created in the patellar tendons of both  
56 groups of mice, and wounds were treated with either saline, PRP isolated from PLT HMGB1 KO  
57 mice, or PRP isolated from GFP mice. Seven days post-treatment, animals were sacrificed and  
58 analyzed by gross inspection, histology, and immunostaining for characteristic signs of tendon  
59 healing and repair. Our results showed that in comparison to mice treated with PRP from PLT  
60 HMGB1-KO mice, wounds treated with PRP from GFP mice healed faster and exhibited a better  
61 organization in tendon structure. Mice treated with PRP from PLT HMGB1-KO mice produced  
62 tendon tissue with large premature wound areas and low cell densities. However, wounds of PLT  
63 HMGB1 KO mice showed better healing with PRP from HMGB1 KO mice compared to saline  
64 treatment. Moreover, wounds treated with PRP from GFP mice had increased extracellular  
65 HMGB1, decreased CD68, increased stem cell markers CD146 and CD73, and increased  
66 collagen III protein expression levels compared to those treated with PRP from PLT HMGB1  
67 KO mice. Thus, PLT HMGB1 within PRP plays an important role in the healing of wounded  
68 tendon. Our findings also suggest that the efficacy of PRP treatment for tendon injuries in clinics  
69 may be affected by PLT HMGB1 within PRP preparations.

70 **Keywords:** Tendon injury; Wound healing; PRP; Platelets, HMGB1

## 71 **Introduction**

72 Tendon injuries to the Achilles and patellar tendons are prevalent in both occupational and  
73 athletics populations. Overall, injured tendon healing is slow and yields an inferior quality of  
74 tendon tissue that is prone to re-injury. Many therapeutic approaches including injection of  
75 autologous platelet-rich plasma (PRP) have been devised to manage tendon injuries (1, 2). The  
76 use of PRP is a popular option in the treatment of tendon injuries in orthopaedics and sports  
77 medicine (1, 2), however the efficacy of PRP treatment on tendon injuries, particularly in  
78 clinical trials, has been controversial. Several studies have reported that PRP can effectively  
79 treat tendon injuries (3-5), whereas others have shown the opposite with no improvement in  
80 pain or tendon function after PRP treatment (6-8). Thus, further investigation into the role of  
81 platelets (PLTs) in tendon wound healing is essential to understand the PLT action mechanism  
82 in PRP and improve the efficacy of PRP in treating tendon injuries.

83

84 Although lacking nuclei, platelets are a rich source of high mobility group box-1 (HMGB1), a  
85 highly conserved nuclear protein that is released by all cell types upon injury (9, 10). The  
86 function of HMGB1 as an inflammatory molecule or chemoattractant is dependent upon its  
87 redox state. When inside the cell, either in the nucleus or cytoplasm, HMGB1 is completely  
88 reduced as fully reduced HMGB1 (frHMGB1). Once released to the extracellular matrix,  
89 frHMGB1 is partially oxidized to disulfide HMGB1 (dsHMGB1) that is believed to initiate  
90 inflammation (11). Research has suggested that during platelet activation, HMGB1 is  
91 presented on the cell surface and released in significant amounts, with the current theory that  
92 HMGB1 is fully reduced at this stage (12-15). Therefore, we hypothesized that platelet  
93 HMGB1 (PLT HMGB1) within PRP may have an important role in tendon injury healing. To

94 test the hypothesis, we investigated the effect of PLT HMGB1 within PRP on wounded tendon  
95 healing using a transgenic mouse line with platelet-specific ablation of HMGB1 (PLT  
96 HMGB1-KO). The findings of this study showed that PLT-HMGB1 within PRP preparations  
97 is able to facilitate proper healing and repair of tendon injuries.

98

## 99 **Materials and methods**

### 100 *Animals*

101 All experiments were performed according to the relevant guidelines and regulations. The  
102 protocol for animal use was approved by the Institutional Animal Care and Use Committee of  
103 the University of Pittsburgh (IACUC protocol #18083391). C57BL/6-Tg (UBC-GFP) mice were  
104 obtained from Jackson Laboratory (Bar Harbor, ME). Mice with platelet-specific ablation of  
105 HMGB1 (Pf4-Cre Hmgb1<sup>fl/fl</sup> mice, referred to as PLT HMGB1-KO mice) were generated as  
106 described elsewhere using the Cre/loxP system (16).

107

### 108 *Isolation and preparation of platelets and PRP*

109 Mice were anesthetized with isoflurane, and blood was drawn from the retro-orbital plexus into  
110 anti-coagulated tubes. PRP was obtained by centrifugation at 500g for 10 min. Platelets were  
111 first pelleted from PRP by centrifugation at 1,000g for 10 min, and were then resuspended in  
112 ACD buffer consisting of 39 mM citric acid, 75 mM sodium citrate, and 135 mM dextrose with 5  
113 mM of EDTA according to the published protocol (17). This platelet solution was used for the  
114 following experiments.

115

### 116 *Determination of HMGB1 in activated platelets*

117 Isolated platelets were activated by adding 100  $\mu$ l of 10,000 U/ml bovine thrombin solution into  
118 0.4 ml of  $1 \times 10^8$ /ml platelet-ACD solution at room temperature for 30 min. The reaction mixture  
119 was centrifuged at 1,000g for 10 min, and the supernatant was collected to determine the amount  
120 of HMGB1 released from platelets using an HMGB1 ELISA kit according to the manufacturer's  
121 protocol (Shino-Test Corporation, Tokyo, Japan). The pellet was re-suspended with 0.9% of  
122 sodium chloride solution and reacted with a rabbit anti-mouse HMGB1 primary antibody for 3  
123 hrs at room temperature (1:350, abcam, Cat. #ab18256), followed by a goat anti-rabbit secondary  
124 antibody conjugated with Cy3 for 1hr at room temperature (1:500, Millipore, Cat. #AP132C).

125

#### 126 *Mouse tendon wound healing model*

127 The effect of PLT HMGB1 on tendon wound healing was tested with a window defect created in  
128 each patellar tendon (PT) of PLT HMGB1-KO mice and GFP mice using a 1 mm diameter  
129 biopsy punch. Wounded PLT HMGB1-KO mice and GFP mice were divided into three groups  
130 (3 mice/group). Group 1 mice were treated with 10  $\mu$ l of saline (**Saline**), group 2 mice were  
131 treated with 8  $\mu$ l of PLT HMGB1-KO PRP and 2  $\mu$ l of bovine thrombin for PRP activation (**KO-**  
132 **PRP**), and group 3 mice were treated with 8  $\mu$ l of GFP-PRP and 2  $\mu$ l of bovine thrombin  
133 (**GFP-PRP**). All mice were sacrificed at 7 days post-injury, and patellar tendons were harvested.  
134 The effect of PLT HMGB1 on wounded tendon healing and cell migration was assessed by  
135 histological analysis.

136

#### 137 *Histochemical staining on mouse tendon tissue sections*

138 Tendon tissue sections were fixed with 4% paraformaldehyde for 20 min at room temperature,  
139 and then washed three times with PBS. Slides were stained with H&E at room temperature

140 according to the standard protocols, washed with water 3 times, and dehydrated through 15%,  
141 30%, 50%, 75%, 95% alcohol, and absolute alcohol for five minutes each. Finally, slides were  
142 treated with xylene and mounted with resinous mounting medium. The staining results were  
143 observed and imaged on a microscope (Nikon eclipse, TE2000-U).

144

#### 145 *Immunostaining on mouse tendon tissue sections*

146 For immunostaining, the patellar tendons were dissected from the mice and were immediately  
147 immersed in O.C.T compound (Sakura Finetek USA Inc., Torrance, CA) in disposable molds  
148 and frozen at -80°C. Then, cryo-sectioning was performed at -25°C to obtain ~ 8 µm thick tissue  
149 sections, which were left at room temperature overnight. The tissue sections were fixed in 4%  
150 paraformaldehyde for 15 min and blocked with universal blocking solution (ThermoFisher  
151 Scientific, Pittsburgh, PA, Cat. #37515). The sections were then incubated with rabbit anti-  
152 mouse HMGB1 antibody (1:350, abcam, Cat. #ab18256) at 4°C overnight followed by goat anti-  
153 rabbit secondary antibody conjugated with Cy3 for 1 hr at room temperature (1:500, Millipore,  
154 Cat. #AP132C). Since the purpose of this staining was to evaluate the presence of extracellular  
155 HMGB1 in the tendon, the tissue sections were not treated with the penetration reagent Triton-  
156 X100 that permeates the nuclear membrane.

157

158 Similarly, the fixed tissue sections were reacted individually overnight at 4°C with the  
159 following primary antibodies: rabbit anti-CD68 antibody (1:500, Abcam, Cat. #125212,  
160 Cambridge, MA), rabbit anti-CD146 antibody (1:500, Abcam, Cat. #75769; Cambridge, MA),  
161 rabbit anti-CD73 antibody (1:500, LSBio, Cat. #LS-B14527-50, Seattle, WA), or rabbit anti-

162 collagen III antibody (1:500, ThermoFisher, Cat. #22734-1-AP, Waltham, MA). In the next  
163 morning, tissue sections were washed 3 times with PBS and incubated at room temperature for  
164 2 hrs with Cy3-conjugated goat anti-rabbit IgG antibody (1:500, Millipore, Cat. #AP132C).  
165 Total cell numbers were stained with 4,6-diamidino-2-phenylindole (DAPI). The stained  
166 tendon tissue sections were imaged using the fluorescent microscope (Nikon eclipse, TE2000-  
167 U).

168

### 169 *Semi-quantification of positively stained tissue sections*

170 The percentage of HMGB1 expression in activated platelets from PLT HMGB1-KO and GFP  
171 mice was determined by semi-quantification. Platelets were stained for HMGB1 (as above) from  
172 three mice of each group, smeared onto a glass slide, and imaged using a fluorescent microscope  
173 (Nikon eclipse, TE2000-U). The percentages of HMGB1 expression in platelets were calculated  
174 by dividing the number of positively stained platelets with red fluorescence by the total number  
175 of platelets.

176

177 For semi-quantification of cell marker staining in tissue sections, stained tissue sections (3  
178 sections/mouse) in each group (3 mice/group) were examined under a microscope and five  
179 random images were taken. Positively stained areas were manually identified by examining the  
180 images taken and processed using SPOT™ imaging software (Diagnostic Instruments, Inc.,  
181 Sterling Heights, MI). The proportion of positive staining was calculated by dividing the total  
182 area viewed under the microscope by the positively stained area. These values were averaged to  
183 represent the percentage of positive staining in all the groups.

184

### 185 **Statistical analysis**

186 All results were obtained from 6 tendons (three mice) from each group and presented as the  
187 mean  $\pm$  SD. The statistical analyses were performed with an unpaired student *t*-test. When  $P <$   
188 0.05, the two groups in comparison were considered significantly different.

189

## 190 **Results**

191

### 192 *Expression of HMGB1 is decreased in platelets of PLT HMGB1-KO mice*

193 First, the expression of PLT HMGB1 was assessed for both transgenic lines, specifically Pf4-Cre  
194 *Hmgb1<sup>fl/fl</sup>* mice, referred to as PLT HMGB1-KO mice, and GFP mice. Platelets were isolated  
195 and stained as described in the methods. Immunostaining showed that PLT HMGB1 was  
196 decreased within PLT HMGB1-KO mice (**Fig. 1A, B**) compared to GFP mice (**Fig. 1C, D**).  
197 Semi-quantification (**Fig. 1E**) confirmed these results showing only ~7% of platelets in PLT  
198 HMGB1-KO mice stained positively for HMGB1, but 86% of platelets in GFP mice stained  
199 positively for HMGB1. After verifying both transgenic lines for the level of PLT HMGB1,  
200 further experiments were performed using PRP preparations to investigate the role of PLT  
201 HMGB1 in healing and repair within PRP preparations.

202 -----

### 203 **Fig. 1 KO-PLTs have much less HMGB1 than GFP-PLTs.**

204 -----

### 205 *PRP generated from PLT-HMGB1 KO mice impairs tendon wound healing*

206 Patellar tendon (PT) wounds of mice from each group were treated individually with PRP  
207 generated from either PLT HMGB1-KO mice or from GFP mice. A saline treatment was used as  
208 a control treatment. Saline treated wound exhibited large unhealed wound areas (red arrows in  
209 **Fig. 2A, D**), whereas wounds treated with either KO or GFP-PRP in both mice groups (**Fig. 2B,**



210 C, E, F) had better healing compared to saline treated wounds. Further gross inspection showed  
211 that wound healing in the patellar tendons of PLT HMGB1-KO mice displayed unhealed wound  
212 areas in all treatment groups (Fig. 2A-C, yellow and green arrow in B and C, respectively)  
213 compared to GFP mice (Fig. 2E, F). PLT HMGB1-KO mice treated with GFP-PRP (Fig. 2C)  
214 exhibited slightly better healing compared to treatment with KO-PRP (Fig. 2B). However, PLT  
215 HMGB1-KO mice treated with KO-PRP (Fig. 2B) had better healing than a saline treatment  
216 (Fig. 2A, red arrow). These results indicated that PLT HMGB1 within PRP preparations is  
217 required for promoting tendon wound healing by PRP.

218 -----

219 **Fig. 2 PRP generated from PLT HMGB1-KO mice adversely affects wounded patellar**  
220 **tendon healing.**

221 -----

222 Histological analysis by H&E staining confirmed our gross inspection results. The wounds in the  
223 patellar tendons of PLT HMGB1-KO mice healed poorly overall, while wounds in GFP-PRP  
224 treated mice healed faster (Fig. 3). Specifically, PLT HMGB1-KO mice treated with KO-PRP  
225 still exhibited large unhealed areas (black arrows, Fig. 3B) although GFP-PRP treated KO mouse  
226 wound displayed better healing (Fig. 3C) compared to that treated with KO-PRP (Fig. 3B). In  
227 contrast, GFP-mice treated with GFP-PRP had complete healing with a normal-like tendon  
228 appearance (Fig. 3F), while unhealed wound areas were found in GFP mice treated with KO-  
229 PRP (Fig. 3E). GFP-PRP treated wounds in the patellar tendon of GFP mice displayed newly  
230 formed tendon tissue in the wound area with normal-like tendon organization (Fig. 3F). Saline  
231 treated tendons produced large unhealed wound areas in both mice groups (red arrows in Fig.  
232 3A, D), in contrast to PRP treatment which generally enhanced healing in patellar tendons

233 despite the model or form of PRP used as a treatment (**Fig. 3B-F**). These results further confirm  
234 that PLT HMGB1 within PRP preparations is able to enhance tendon healing, and without PLT  
235 HMGB1, tendon wound healing is reduced and slowed in comparison.

236 -----

237 **Fig. 3 Wounded PTs treated with KO-PRP heals much slower than those treated with**  
238 **GFP-PRP.**

239 -----

240 *HMGB1 level in tendon matrix is low in PLT-HMGB1-KO mice after PRP treatment*

241 Previous research has shown that the release of local HMGB1 from injured tissues can enhance  
242 the healing and regeneration of skeletal, hematopoietic and muscle tissues *in vivo* (18). Thus, to  
243 further evaluate the role of PLT-HMGB1 in PRP preparations in healing and repair, the patellar  
244 tendons from each transgenic injury model with their respective PRP treatments were evaluated  
245 for the release of tendon tissue specific HMGB1 at the site of injury. Each patellar tendon was  
246 assessed with immunostaining for HMGB1 to determine how the presence or absence of PLT  
247 HMGB1 in both the GFP-PRP and KO-PRP may affect healing and repair within our model. Our  
248 results showed that the acute injury model induced the release of HMGB1 from local tendon  
249 tissue surrounding the wound area to the tendon matrix in both GFP mice and PLT HMGB1-KO  
250 mice, as evidenced by positively stained HMGB1 (red fluorescence in **Fig. 4**). However, reduced  
251 levels of HMGB1 can be seen within the tendon matrix of PLT HMGB1-KO mice (**Fig. 4A-L**)  
252 in comparison to the elevated level of HMGB1 released in tendons of GFP mice (**Fig. 4M-X**).  
253 Fluorescent image analysis indicated that GFP-PRP treatment increased the levels of HMGB1 in  
254 the tendon matrix of both transgenic mouse lines specifically due to treatment with GFP-PRP  
255 (**Fig. 4I-L, 4U-X**). However, the concentration of locally released HMGB1 in the tendons treated

256 with PLT HMGB1-KO-PRP were not significantly increased (**Fig. 4E-H**). Thus, PLT HMGB1 is  
257 able to enhance the presence of local HMGB1 at the injury site.

258 -----

259 **Fig. 4 HMGB1 expression in KO-PRP treated wound is much lower than GFP-PRP treated**  
260 **wound.**

261 -----

262 ***PRP from PLT-HMGB1-KO mice increases inflammation in wounded tendon***

263 Collected patellar tendon tissues were analyzed for CD68, a marker of M1 pro-inflammatory  
264 macrophages (19, 20), using immunostaining. Overall, the levels of CD68 in the wound areas of  
265 PLT HMGB1-KO mice (**Fig. 5A-F**) were much higher than that of GFP mice (**Fig. 5G-L**). Many  
266 CD68 positive cells were found in wounded tendons of both groups of mice treated with saline  
267 (**Fig. 5A, B, 5G, H**) suggesting a high level of tissue inflammation. In PLT HMGB1-KO mice,  
268 GFP-PRP treatment decreased CD68 expression (**Fig. 5E, F**) compared to PRP from KO mice  
269 (**Fig. 5C, D**). However, in GFP mice, treatment with GFP-PRP significantly decreased positively  
270 stained CD68 cells (**Fig. 5K, L**) compared to the same group treated with PRP from KO mice  
271 (**Fig. 5I, J**). Taken together, these results suggest that ablation of PLT HMGB1 in PRP results in  
272 significant levels of CD68<sup>+</sup> M1 macrophages in treated tendon tissues, while M1 cells are greatly  
273 reduced in tendons treated with normal PRP treatments. Semi-quantification supports these  
274 results (**Fig. 5M**), showing that GFP-PRP is able to reduce the level of CD68<sup>+</sup> M1 macrophages  
275 in both transgenic mouse lines, while both saline and KO-PRP are largely similar in the level of  
276 CD68<sup>+</sup> cells.

277 -----

278 **Fig. 5 Macrophage marker CD68 expression is much higher in KO-PRP treated wound**  
279 **than GFP-PRP treated wound.**

280 -----

281 *Stem cell marker expression is reduced in wounded mouse tendons treated with PRP from*  
282 *PLT-HMGB1-KO*

283 HMGB1 have been shown to enhance tissue repair by recruiting resident stem cells (21). Thus,  
284 to assess the effect of PLT HMGB1 on resident stem cells patellar tendon tissues were  
285 immunostained for CD146 and CD73 stem cell marker expression (22, 23). GFP-PRP treatment  
286 of both transgenic mouse lines recruited stem cells to the wound areas, as shown by elevated  
287 CD146<sup>+</sup> cells within GFP-PRP treated tendons (**Fig. 6E, F, 6K, L**) compared to tendons treated  
288 with KO-PRP (**Fig. 6C, D, 6I, J**). However, few CD146<sup>+</sup> cells can be seen in the saline-treated  
289 tendons of PLT-HMGB1-KO mice (**Fig. 6A, B**) compared to saline treatment of GFP mice (**Fig.**  
290 **6G, H**). Overall, higher levels of CD146<sup>+</sup> cells were found in the tendons of GFP mice (**Fig. 6G-**  
291 **L**) compared to PLT HMGB1-KO tendons (**Fig. 6A-F**). Semi-quantification supports these  
292 results (**Fig. 6M**), showing that GFP-PRP treatment elevated CD146<sup>+</sup> cells in both transgenic  
293 lines, with the highest levels found within GFP mice.

294 -----

295 **Fig. 6 Stem cell marker CD146 expression is much lower in KO-PRP treated wound than**  
296 **GFP-PRP treated wound.**

297 -----

298 Similar results were found with CD73 levels in wounded tendons (**Fig. 7**). Few CD73<sup>+</sup> cells can  
299 be seen within saline-treated tendons of PLT HMGB1-KO mice (**Fig. 7A, B**), compared to saline

300 treated GFP mice (**Fig. 7G, H**). Overall, both PLT HMGB1-KO PRP and GFP-PRP were able to  
301 increase the level of CD73<sup>+</sup> cells but to different degrees. GFP-PRP treatment increased CD73<sup>+</sup>  
302 cells in both mouse lines (**Fig. 7E, F, 7K, L**), surpassing the effect of PLT HMGB1-KO PRP on  
303 CD73 levels (**Fig. 7C, D, 7I, J**). Semi-quantification of CD73 staining supports these results  
304 (**Fig. 7M**), with GFP-PRP treatment producing elevated CD73<sup>+</sup> cells in both transgenic lines  
305 with the highest levels in the treated tendons of GFP mice. Taken together, these results suggest  
306 that HMGB1 ablation in PLTs can negatively affect tendon wound healing by decreasing stem  
307 cell recruitment.

308 -----

309 **Fig. 7 Stem cell marker CD73 expression is much lower in KO-PRP treated wound**  
310 **compared to GFP-PRP treated wound.**

311 -----

312 ***PRP from PLT-HMGB1-KO mice impairs collagen III production in wounded tendons***

313 Collagen type III (Col III) has an important role in the healing process of tendon (24).  
314 Immunostaining for Col III was carried out to assess healing within wounded and treated patellar  
315 tendons. Overall, Col III expression was higher in the treated tendons of GFP mice (**Fig. 8G-L**)  
316 compared to tendons in PLT HMGB1-KO mice (**Fig. 8A-F**). Also, GFP-PRP treatment increased  
317 Col III levels in wounded tendons in both mouse lines (**Fig. 8E, F, 8K, L**), compared to PLT  
318 HMGB1-KO PRP treatment (**Fig. 8C, D, 8I, J**). The results indicate that in contrast to normal  
319 PLTs in GFP mice, HMGB1-ablated PLTs impair tendon wound healing due to decreased Col III  
320 levels. Semi-quantification supports this conclusion (**Fig. 8M**), with the GFP-PRP treatment  
321 surpassing the KO-PRP treatment in Col III production. Finally, similar to other results above,  
322 GFP-PRP treatment was able to produce the highest Col III production in GFP mice.

323 -----

324 **Fig. 8 Tendon matrix marker collagen III expression is much lower in KO-PRP treated**  
325 **wound than GFP-PRP treated wound.**

326 -----

## 327 **Discussion**

328 This study investigated the effect of platelet-derived HMGB1 in PRP on wounded tendon  
329 healing using a transgenic mouse line with a specific platelet HMGB1 ablation. Our results have  
330 demonstrated that in an acute patellar tendon injury model treated with PRP from mice lacking  
331 platelet-derived HMGB1, tendon healing was impaired. Impaired healing was characterized by a  
332 decrease in local HMGB1 release from injured tissues, an increase in CD68<sup>+</sup> M1 macrophage  
333 cells, a decrease in CD146<sup>+</sup> and CD73<sup>+</sup> stem cells, and a decrease in Col III content. In contrast,  
334 treatment with PRP from GFP-mice increased local HMGB1 concentrations in the wound area,  
335 reduced the recruitment of inflammatory cells to wounded tendons, increased the recruitment of  
336 stem cells, and increased Col III levels. Although the wounds treated with PLT HMGB1-KO-  
337 PRP healed faster than the wounds treated with saline, they healed much slower in comparison to  
338 wounds treated with GFP-PRP. This slowed healing is likely due to the ablation of PLT HMGB1  
339 in these mice, with our results showing the expression of minimal amounts of PLT HMGB1  
340 (**Fig. 1**) that may still facilitate some level of healing compared to the saline treatment. Our  
341 results also demonstrated that GFP-PRP treatment enhanced wounded tendon healing in both  
342 mouse lines, however to a greater extent in GFP mice than in PLT HMGB1-KO mice. In GFP  
343 mice, endogenous HMGB1 in addition to PLT HMGB1 within GFP-PRP were collectively  
344 involved in enhancing tendon healing. Thus, our results showed that HMGB1 in platelets is a

345 critical factor in PRP treatment, and the efficacy of PRP treatment for tendon injuries in clinics  
346 may depend on the level of PLT HMGB1 within PRP preparations.

347  
348 Tendon injury is one of the most common musculoskeletal injuries that can persist for years with  
349 poorly repaired tendon leading to further re-injury. In current clinical practices, PRP is widely  
350 used to treat tendon injuries (2, 25), with a number of studies showing that PRP treatment  
351 promotes the healing and physical function of wounded tendon (1, 2, 5, 26). These beneficial  
352 effects are attributed to the platelets in PRP, the role of which is well-established in wound  
353 healing and tissue repair (27). In fact, platelets are the “first responders” during wounding that  
354 trigger platelet activation and aggregation (28). Once activated, platelets release many factors  
355 (e.g. cytokine and growth factors) to enhance healing of injured tissues (29).

356  
357 In particular, HMGB1, which is abundant in platelets (13, 15, 30), is also released by activated  
358 platelets. It has been shown that HMGB1 released by injured tissues promotes tissue repair by  
359 inducing migration and proliferation of stem cells (31-33). Locally released HMGB1 recruits  
360 bone marrow-derived mesenchymal stem cells (MSCs), and promotes the proliferation and  
361 differentiation of tissue-associated resident stem cells (11, 33, 34). For instance, vascularization  
362 of regenerating tissue is compromised in the absence of leukocyte HMGB1 in a mouse model  
363 lacking HMGB1 in the hematopoietic system, but vessel number and vascular area were  
364 significantly higher in the presence of leukocyte HMGB1 (35). This study indicated that  
365 leukocyte HMGB1 controls the nutrient and oxygen supply to the regenerating tissue. A study  
366 demonstrating the role of HMGB1 in muscle regeneration has shown that heterozygous  
367 HMGB1<sup>+/-</sup> mice, which express 50% less HMGB1 when compared with wild type mice, have

368 delayed muscle regeneration after acute injury (36). Fully reduced frHMGB1 has been gaining  
369 much attention as a chemoattractant that orchestrates tissue regeneration (18, 21). This  
370 subsequent increase in stem cells in response to HMGB1 administration suggested that the  
371 regenerative properties of HMGB1 were mediated by muscle stem cells and high expression of  
372 HMGB1 is required for optimal skeletal muscle regeneration (21). Exogenous administration of  
373 a single dose of HMGB1, either locally or systemically, promoted tissue repair by targeting  
374 endogenous stem cells. Using HMGB1<sup>-/-</sup> mice, they identified the underlying mechanism as the  
375 transition of quiescent stem cells from G<sub>0</sub> to G<sub>Alert</sub>, and these primed cells rapidly respond to  
376 appropriate activating factors released upon injury. These studies support our findings by  
377 highlighting the role of HMGB1 as a chemoattractant that promotes regeneration of wounded  
378 tendons by recruiting stem cells to injury site.

379  
380 Macrophages are known to play an essential role in orchestrating inflammation and tissue repair  
381 (37). Macrophages secrete various growth factors and signaling molecules and are thus involved  
382 in the regulation of inflammation, wound healing, and tissue repair (38). Our findings show that  
383 active inflammation is present within wounds treated with PRP from PLT HMGB1-KO mice as  
384 indicated by the presence of CD68<sup>+</sup> M1 macrophages (39), in contrast those treated with PRP  
385 from GFP mice. Inflammation can have a detrimental effect on healing. Chronic wounds fail to  
386 heal because they are stalled in an early inflammatory state during wound healing (40). For acute  
387 injuries, prolonged inflammation can lead to slow healing which may cause the wound to enter a  
388 chronic state and fail to heal (41). Thus, controlling inflammation may be an important step in  
389 preventing certain acute injuries from progressing to a chronic state. Research has shown that  
390 HMGB1 is able to mediate macrophage polarization (42). M1 macrophages are characterized by



391 a proinflammatory phenotype which produces proinflammatory cytokines, phagocytosis of  
392 microbes, and initiate an immune response (19). M2 phenotype macrophages are a tissue-healing  
393 phenotype that releases more HMGB1, which may activate stem cells and promote tissue healing  
394 (43, 44). The switch from a proinflammatory M1 to a tissue-healing M2 phenotype in  
395 macrophages is an essential step in muscle regeneration to limit the inflammatory response (20,  
396 45). Our results have shown that local HMGB1 is released in high levels in the wounded tendon  
397 matrix when treated with PRP from GFP mice as opposed to low levels of local HMGB1 release  
398 due to treatment with KO-PRP. This elevated level of local HMGB1 expression may help switch  
399 M1 macrophages to tissue healing M2 phenotype that may enhance healing (46). Further  
400 research however is needed to evaluate the effect of PLT HMGB1 on the M2 phenotype and on  
401 macrophage polarization in an acute tendon injury model.

402

403 As described above, many studies have demonstrated that HMGB1 activates endogenous stem  
404 cells to accelerate tissue regeneration (18, 21). Our results indicated that tendon wounds treated  
405 with PRP from mice lacking platelet-derived HMGB1 harbor a reduced number of CD146<sup>+</sup> and  
406 CD73<sup>+</sup> stem cells (**Fig. 6, 7**). Our results indicate that both platelet and local HMGB1 facilitates  
407 stem cell migration in normal wound healing. Our results also demonstrate high level of Col III  
408 expression in wounds treated by normal PRP suggesting normal wound healing is occurring, in  
409 contrast to the low level in KO mice PRP treated ones. Although Col III is not a major  
410 component of the normal tendon, it is believed to play an important role during the healing  
411 process because of its ability to form rapid crosslinks and stabilize the repair site (24).

412

413 Certain limitations are present within our study. Primarily, our resource for PLT HMGB1-KO  
414 mice is limited and as such our study only evaluated healing and repair at a single, relatively  
415 short timepoint (or 7 days post-injury) and only focused on the assessment of a limited number  
416 of cell markers. Further research is needed within a longer healing timeframe to further assess  
417 the effect of the ablation of PLT HMGB1 on tendon healing and repair.

418

419 In conclusion, this study has demonstrated that PLT HMGB1 within PRP plays an important role  
420 in healing wounded tendon by decreasing inflammation, increasing local HMGB1 levels, and  
421 recruiting stem cells to the wound area. These results provide the first evidence for the role of  
422 HMGB1 within PRP as a therapeutic treatment to promote tendon wound healing. Our findings  
423 suggest that the efficacy of PRP treatment for tendon injuries in clinics may depend on PLT  
424 HMGB1 within PRP preparations.

425

## 426 **Acknowledgements**

427 We thank Dr. Bhavani P Thampatty for assistance in the preparation of this manuscript.

428

429

## 430 **Figure Legends**

431 **Fig. 1 KO-PLTs have much less HMGB1 than GFP-PLTs. A, B:** HMGB1 expression in the  
432 platelets of HMGB1-KO mice (KO-PLT); **C, D:** HMGB1 expression in the platelets of GFP  
433 mice (GFP-PLT); **B, D:** Enlarged images of the box areas in the image **A** and **C**. **E:** Semi-  
434 quantification of positively stained platelets with HMGB1 confirms the results of

435 immunostaining showing that only a few (~7%) platelets in HMGB1-KO mice are positively  
436 stained with HMGB1 compared to more than 86.8% of platelets in GFP mice were positively  
437 stained with HMGB1. \*P < 0.01 (GFP-PLT vs. KO-PLT). Green bars: 50  $\mu$ m; Yellow bars: 10  
438  $\mu$ m.

439

440 **Fig. 2 PRP generated from PLT HMGB1-KO mice adversely affects wounded PT healing.**

441 Results show that wounded PTs of PLT HMGB1-KO mice (KO mice) healed slower (**A-C**, red,  
442 yellow, and green arrows point to unhealed area) than PTs in GFP mice (**D-F**). However, PRP  
443 (KO-PRP or GFP-PRP) treated wound (**B, C, E, F**) healed much faster than the wounds treated  
444 with saline (**A, D**, red arrows). PT: patellar tendon; KO-PRP: PRP prepared from PLT HMGB1-  
445 KO mice; and GFP-PRP: PRP prepared from GFP mice.

446

447 **Fig. 3 Wounded PTs treated with KO-PRP heals much slower than those treated with**

448 **GFP-PRP.** Results show that wounded patellar tendons in PLT HMGB1-KO mice heal slower  
449 (**A-C**, black arrows in **B** and **C** show unhealed and disorganized area) than GFP mice (**D, F**).  
450 PRP treated wounds (**B, C, E, F**) healed much faster than wounded patellar tendons treated with  
451 saline (**A, D**, red arrows point to large unhealed area). KO-PRP: PRP from PLT HMGB1-KO  
452 mice; and GFP-PRP: PRP from GFP mice. Black bars: 100  $\mu$ m (H&E staining).

453

454 **Fig. 4 HMGB1 expression in KO-PRP treated wound is much lower than GFP-PRP treated**

455 **wound.** Higher levels of HMGB1 are found in the wound areas of GFP tendons (**M-X**) than that  
456 of PLT HMGB1-KO mouse patellar tendons (**A-L**). GFP-PRP treated wound areas (**I-L**, and U-

457 **X)** have much more HMGB1 than the wounds treated with saline (**A-D**, and **M-P**). KO-PRP:  
458 PRP from PLT HMGB1-KO mice; and GFP-PRP: PRP from GFP mice. White bars: 200  $\mu$ m,  
459 Yellow bars: 50  $\mu$ m (immunostaining).

460

461 **Fig. 5 Macrophage marker CD68 expression is much higher in KO-PRP treated wound**  
462 **than GFP-PRP treated wound.** Higher levels of CD68 are found in the wound areas of PLT  
463 HMGB1-KO mouse patellar tendons (**A-F**) than that of GFP mouse tendons (**G-L**). GFP-PRP  
464 treated wound areas (**E, F, and K, L**) have decreased CD68 expression compared with saline  
465 treated wounds (**A, B, and G, H**). Semi-quantification (**M**) confirms the results. \* $P < 0.01$  (KO-  
466 PRP vs. GFP-PRP). KO-PRP: PRP from PLT HMGB1-KO mice; and GFP-PRP: PRP from GFP  
467 mice. White bars: 200  $\mu$ m; Yellow bars: 50  $\mu$ m (immunostaining).

468

469 **Fig. 6 Stem cell marker CD146 expression is much lower in KO-PRP treated wound than**  
470 **GFP-PRP treated wound.** Very low levels of CD146 are found in the wound areas of KO-PRP  
471 treated mice (**A-F**) compared GFP tendons which have much higher level of CD146 expression  
472 (**G-L**). GFP-PRP treated wound areas (**E, F and K, L**) have much more CD146 than the wounds  
473 treated with saline (**A-D and G-J**). Semi-quantification (**M**) confirms the results. \* $P < 0.01$  (KO-  
474 PRP vs. GFP-PRP). KO-PRP: PRP from PLT HMGB1-KO mice; and GFP-PRP: PRP from GFP  
475 mice. White bars: 200  $\mu$ m; Yellow bars: 50  $\mu$ m (immunostaining).

476

477 **Fig. 7 Stem cell marker CD73 expression is much lower in KO-PRP treated wound**  
478 **compared to GFP-PRP treated wound.** Very low levels of CD73 are found in the wound areas

479 of KO-PRP mouse patellar tendons (**A-F**) compared to GFP tendons, which have much higher  
480 levels of CD73 expression(**G-L**). However, both KO-PRP treated and GFP-PRP treated wound  
481 areas (**C-F**, and **I-L**) have more CD73 than the wounds treated with saline (**A**, **B**, and **G**, **H**).  
482 Semi-quantification (**M**) confirms the results. \*P < 0.01 (KO-PRP vs. GFP-PRP). KO-PRP: PRP  
483 from PLT HMGB1-KO mice; GFP-PRP: PRP from GFP mice. White bars: 200  $\mu$ m; Yellow  
484 bars: 50  $\mu$ m (immunostaining).

485

486 **Fig. 8 Tendon matrix marker collagen III expression is much lower in KO-PRP treated**  
487 **wound than GFP-PRP treated wound.** Very low levels of collagen III are found in the wound  
488 areas of KO-PRP mouse patellar tendons (**A-F**) compared to GFP tendons with higher levels of  
489 Col III (**G-L**). KO-PRP and GFP-PRP treated wound areas (**C-F**, and **I-L**) have more Col III  
490 than the wounds treated with saline (**A**, **B**, and **G**, **H**). Semi-quantification (**M**) confirms the  
491 results. \*P < 0.01 when KO-PRP treatment is compared to GFP-PRP treatment. KO-PRP: PRP  
492 from PLT HMGB1-KO mice; GFP-PRP: PRP from GFP mice. Col III: Collagen type III. White  
493 bars: 200  $\mu$ m; Yellow bars: 50  $\mu$ m (immunostaining).

494

495

## 496 **References**

- 497 1. Andia I, Sanchez M, Maffulli N. Tendon healing and platelet-rich plasma therapies.  
498 Expert Opin Biol Ther. 2010;10(10):1415-26.
- 499 2. Andia I, Martin JI, Maffulli N. Advances with platelet rich plasma therapies for tendon  
500 regeneration. Expert Opin Biol Ther. 2018:1-10.
- 501 3. Kon E, Filardo G, Di Martino A, Marcacci M. Platelet-rich plasma (PRP) to treat sports  
502 injuries: evidence to support its use. Knee Surg Sports Traumatol Arthrosc. 2011;19(4):516-27.

- 503 4. Monto RR. Platelet rich plasma treatment for chronic Achilles tendinosis. *Foot Ankle Int.*  
504 2012;33(5):379-85.
- 505 5. Dragoo JL, Wasterlain AS, Braun HJ, Nead KT. Platelet-rich plasma as a treatment for  
506 patellar tendinopathy: a double-blind, randomized controlled trial. *Am J Sports Med.*  
507 2014;42(3):610-8.
- 508 6. de Vos RJ, Weir A, van Schie HT, Bierma-Zeinstra SM, Verhaar JA, Weinans H, et al.  
509 Platelet-rich plasma injection for chronic Achilles tendinopathy: a randomized controlled trial.  
510 *JAMA : the journal of the American Medical Association.* 2010;303(2):144-9.
- 511 7. de Jonge S, de Vos RJ, Weir A, van Schie HT, Bierma-Zeinstra SM, Verhaar JA, et al.  
512 One-year follow-up of platelet-rich plasma treatment in chronic Achilles tendinopathy: a double-  
513 blind randomized placebo-controlled trial. *Am J Sports Med.* 2011;39(8):1623-9.
- 514 8. Schepull T, Kvist J, Norrman H, Trinks M, Berlin G, Aspenberg P. Autologous platelets  
515 have no effect on the healing of human achilles tendon ruptures: a randomized single-blind  
516 study. *Am J Sports Med.* 2011;39(1):38-47.
- 517 9. Scaffidi P, Misteli T, Bianchi ME. Release of chromatin protein HMGB1 by necrotic  
518 cells triggers inflammation. *Nature.* 2002;418(6894):191-5.
- 519 10. Andersson U, Rauvala H. Introduction: HMGB1 in inflammation and innate immunity. *J*  
520 *Intern Med.* 2011;270(4):296-300.
- 521 11. Venereau E, Ceriotti C, Bianchi ME. DAMPs from Cell Death to New Life. *Frontiers in*  
522 *immunology.* 2015;6:422.
- 523 12. Maugeri N, Franchini S, Campana L, Baldini M, Ramirez GA, Sabbadini MG, et al.  
524 Circulating platelets as a source of the damage-associated molecular pattern HMGB1 in patients  
525 with systemic sclerosis. *Autoimmunity.* 2012;45(8):584-7.
- 526 13. Rouhiainen A, Imai S, Rauvala H, Parkkinen J. Occurrence of amphoterin (HMG1) as an  
527 endogenous protein of human platelets that is exported to the cell surface upon platelet  
528 activation. *Thromb Haemost.* 2000;84(6):1087-94.
- 529 14. Vogel S, Chatterjee M, Metzger K, Borst O, Geisler T, Seizer P, et al. Activated platelets  
530 interfere with recruitment of mesenchymal stem cells to apoptotic cardiac cells via high mobility  
531 group box 1/Toll-like receptor 4-mediated down-regulation of hepatocyte growth factor receptor  
532 MET. *J Biol Chem.* 2014;289(16):11068-82.
- 533 15. Stark K, Philippi V, Stockhausen S, Busse J, Antonelli A, Miller M, et al. Disulfide  
534 HMGB1 derived from platelets coordinates venous thrombosis in mice. *Blood.*  
535 2016;128(20):2435.
- 536 16. Vogel S, Bodenstern R, Chen Q, Feil S, Feil R, Rheinlaender J, et al. Platelet-derived  
537 HMGB1 is a critical mediator of thrombosis. *The Journal of clinical investigation.*  
538 2015;125(12):4638-54.
- 539 17. Mardente S, Mari E, Massimi I, Tafani M, Guerriero R, Morsilli O, et al. From Human  
540 Megakaryocytes to Platelets: Effects of Aspirin on High-Mobility Group Box 1/Receptor for  
541 Advanced Glycation End Products Axis. *Frontiers in immunology.* 2017;8:1946.
- 542 18. Lee G, Espirito Santo AI, Zwingenberger S, Cai L, Vogl T, Feldmann M, et al. Fully  
543 reduced HMGB1 accelerates the regeneration of multiple tissues by transitioning stem cells to  
544 GAlert. *Proceedings of the National Academy of Sciences of the United States of America.*  
545 2018;115(19):E4463-E72.
- 546 19. Barros MH, Hauck F, Dreyer JH, Kempkes B, Niedobitek G. Macrophage polarisation:  
547 an immunohistochemical approach for identifying M1 and M2 macrophages. *PLoS One.*  
548 2013;8(11):e80908.

- 549 20. Wang H, Melton DW, Porter L, Sarwar ZU, McManus LM, Shireman PK. Altered  
550 macrophage phenotype transition impairs skeletal muscle regeneration. *Am J Pathol*.  
551 2014;184(4):1167-84.
- 552 21. Tirone M, Tran NL, Ceriotti C, Gorzanelli A, Canepari M, Bottinelli R, et al. High  
553 mobility group box 1 orchestrates tissue regeneration via CXCR4. *The Journal of experimental*  
554 *medicine*. 2018;215(1):303-18.
- 555 22. Dominici M, Le Blanc K, Mueller I, Slaper-Cortenbach I, Marini F, Krause D, et al.  
556 Minimal criteria for defining multipotent mesenchymal stromal cells. The International Society  
557 for Cellular Therapy position statement. *Cytotherapy*. 2006;8(4):315-7.
- 558 23. Lv FJ, Tuan RS, Cheung KM, Leung VY. Concise review: the surface markers and  
559 identity of human mesenchymal stem cells. *Stem cells (Dayton, Ohio)*. 2014;32(6):1408-19.
- 560 24. Liu SH, Yang RS, al-Shaikh R, Lane JM. Collagen in tendon, ligament, and bone  
561 healing. A current review. *Clin Orthop Relat Res*. 1995(318):265-78.
- 562 25. Foster TE, Puskas BL, Mandelbaum BR, Gerhardt MB, Rodeo SA. Platelet-rich plasma:  
563 from basic science to clinical applications. *Am J Sports Med*. 2009;37(11):2259-72.
- 564 26. Kon E, Filardo G, Delcogliano M, Presti ML, Russo A, Bondi A, et al. Platelet-rich  
565 plasma: new clinical application: a pilot study for treatment of jumper's knee. *Injury*.  
566 2009;40(6):598-603.
- 567 27. Menter DG, Kopetz S, Hawk E, Sood AK, Loree JM, Gresele P, et al. Platelet "first  
568 responders" in wound response, cancer, and metastasis. *Cancer Metastasis Rev*. 2017;36(2):199-  
569 213.
- 570 28. Menter DG, Tucker SC, Kopetz S, Sood AK, Crissman JD, Honn KV. Platelets and  
571 cancer: a casual or causal relationship: revisited. *Cancer Metastasis Rev*. 2014;33(1):231-69.
- 572 29. Eisinger F, Patzelt J, Langer HF. The Platelet Response to Tissue Injury. *Front Med*  
573 (Lausanne). 2018;5:317.
- 574 30. Maugeri N, Campana L, Gavina M, Covino C, De Metrio M, Panciroli C, et al. Activated  
575 platelets present high mobility group box 1 to neutrophils, inducing autophagy and promoting the  
576 extrusion of neutrophil extracellular traps. *Journal of Thrombosis and Haemostasis*.  
577 2014;12(12):2074-88.
- 578 31. Palumbo R, Bianchi ME. High mobility group box 1 protein, a cue for stem cell  
579 recruitment. *Biochemical pharmacology*. 2004;68(6):1165-70.
- 580 32. Chavakis E, Hain A, Vinci M, Carmona G, Bianchi ME, Vajkoczy P, et al. High-mobility  
581 group box 1 activates integrin-dependent homing of endothelial progenitor cells. *Circulation*  
582 *research*. 2007;100(2):204-12.
- 583 33. Tamai K, Yamazaki T, Chino T, Ishii M, Otsuru S, Kikuchi Y, et al. PDGFRalpha-  
584 positive cells in bone marrow are mobilized by high mobility group box 1 (HMGB1) to  
585 regenerate injured epithelia. *Proceedings of the National Academy of Sciences of the United*  
586 *States of America*. 2011;108(16):6609-14.
- 587 34. Zhang X, Jiang H, Gong Q, Fan C, Huang Y, Ling J. Expression of high mobility group  
588 box 1 in inflamed dental pulp and its chemotactic effect on dental pulp cells. *Biochem Biophys*  
589 *Res Commun*. 2014;450(4):1547-52.
- 590 35. Campana L, Santarella F, Esposito A, Maugeri N, Rigamonti E, Monno A, et al.  
591 Leukocyte HMGB1 is required for vessel remodeling in regenerating muscles. *J Immunol*.  
592 2014;192(11):5257-64.



- 593 36. Dormoy-Raclet V, Cammas A, Celona B, Lian XJ, van der Giessen K, Zivojnovic M, et  
594 al. HuR and miR-1192 regulate myogenesis by modulating the translation of HMGB1 mRNA.  
595 Nat Commun. 2013;4:2388.
- 596 37. Oishi Y, Manabe I. Macrophages in inflammation, repair and regeneration. Int Immunol.  
597 2018;30(11):511-28.
- 598 38. Baum CL, Arpey CJ. Normal cutaneous wound healing: clinical correlation with cellular  
599 and molecular events. Dermatol Surg. 2005;31(6):674-86; discussion 86.
- 600 39. Holness CL, Simmons DL. Molecular cloning of CD68, a human macrophage marker  
601 related to lysosomal glycoproteins. Blood. 1993;81(6):1607-13.
- 602 40. Zhao R, Liang H, Clarke E, Jackson C, Xue M. Inflammation in Chronic Wounds.  
603 International journal of molecular sciences. 2016;17(12).
- 604 41. Serra MB, Barroso WA, da Silva NN, Silva SDN, Borges ACR, Abreu IC, et al. From  
605 Inflammation to Current and Alternative Therapies Involved in Wound Healing. International  
606 journal of inflammation. 2017;2017:3406215.
- 607 42. Son M, Porat A, He M, Suurmond J, Santiago-Schwarz F, Andersson U, et al. C1q and  
608 HMGB1 reciprocally regulate human macrophage polarization. Blood. 2016;128(18):2218-28.
- 609 43. Bianchi ME, Crippa MP, Manfredi AA, Mezzapelle R, Rovere Querini P, Venereau E.  
610 High-mobility group box 1 protein orchestrates responses to tissue damage via inflammation,  
611 innate and adaptive immunity, and tissue repair. Immunol Rev. 2017;280(1):74-82.
- 612 44. Wynn TA, Vannella KM. Macrophages in Tissue Repair, Regeneration, and Fibrosis.  
613 Immunity. 2016;44(3):450-62.
- 614 45. Saclier M, Cuvellier S, Magnan M, Mounier R, Chazaud B. Monocyte/macrophage  
615 interactions with myogenic precursor cells during skeletal muscle regeneration. FEBS J.  
616 2013;280(17):4118-30.
- 617 46. Roszter T. Understanding the Mysterious M2 Macrophage through Activation Markers  
618 and Effector Mechanisms. Mediators Inflamm. 2015;2015:816460.

619



# KO-PLT

# GFP-PLT

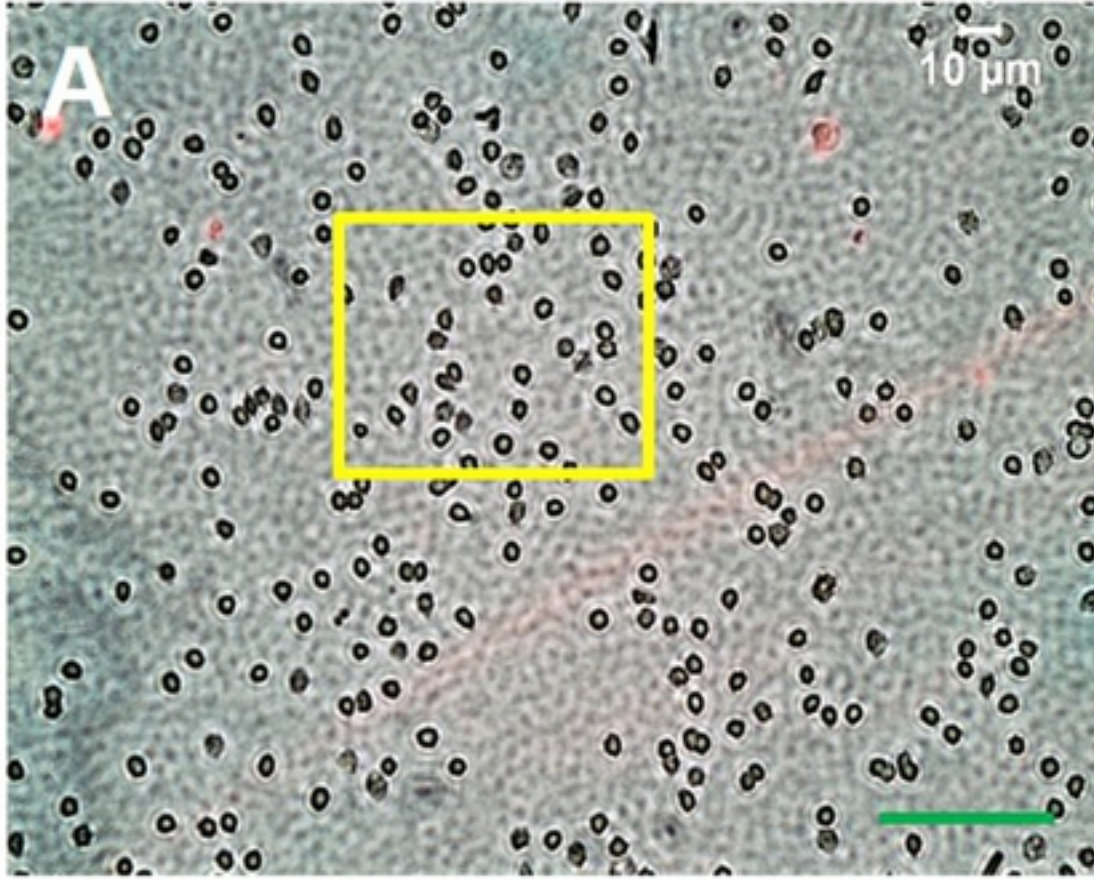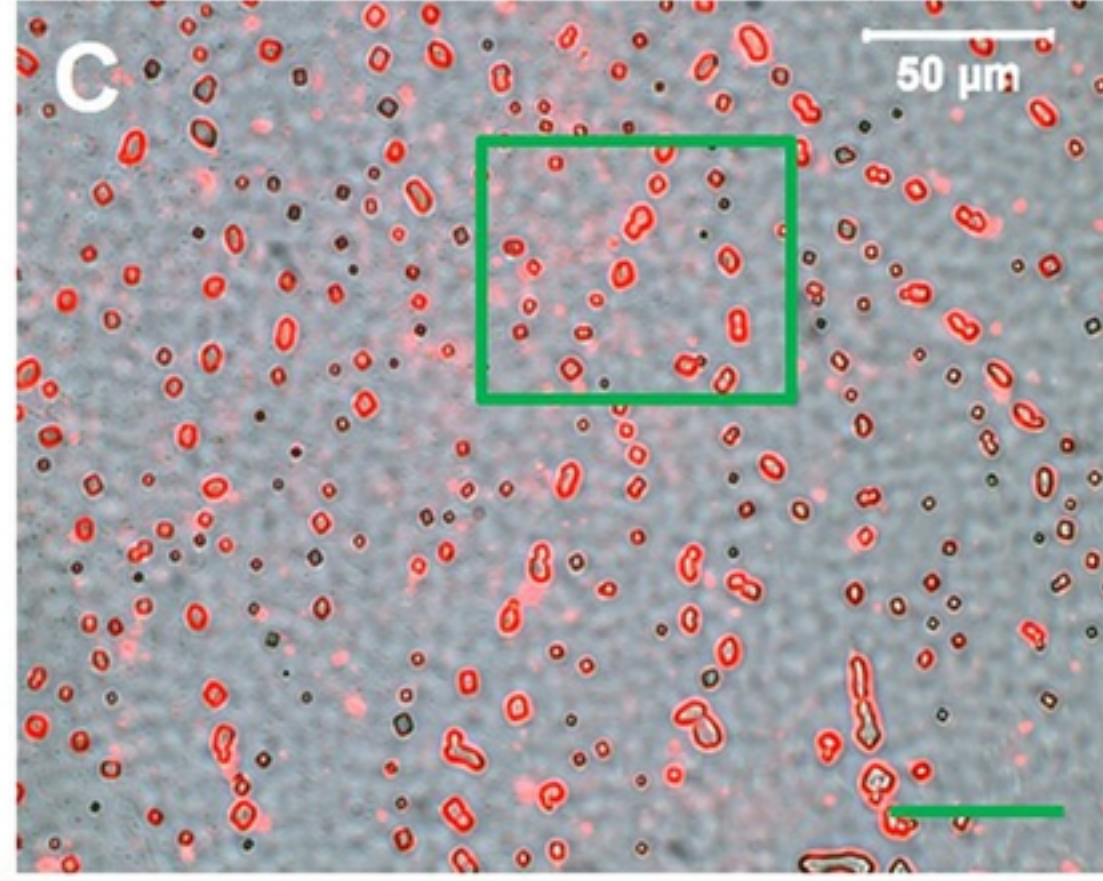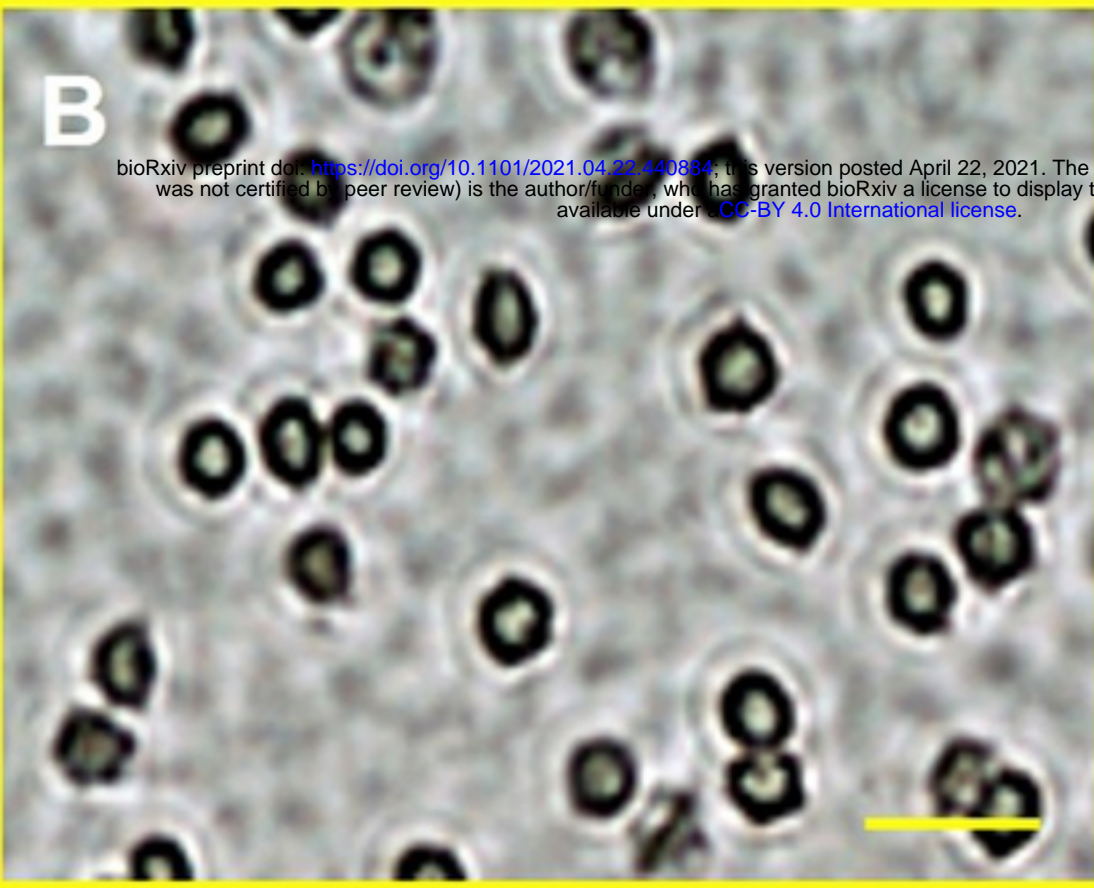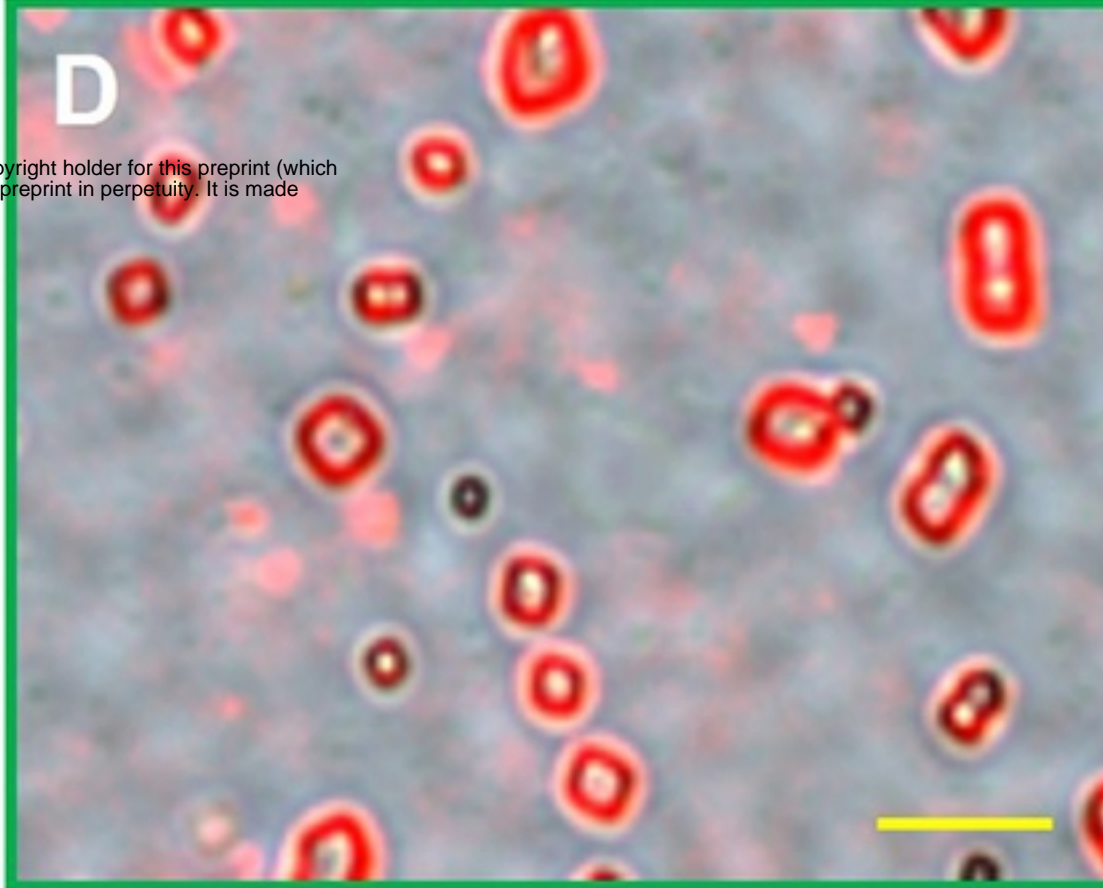

bioRxiv preprint doi: <https://doi.org/10.1101/2021.04.22.440884>; this version posted April 22, 2021. The copyright holder for this preprint (which was not certified by peer review) is the author/funder, who has granted bioRxiv a license to display the preprint in perpetuity. It is made available under a [CC-BY 4.0 International license](https://creativecommons.org/licenses/by/4.0/).

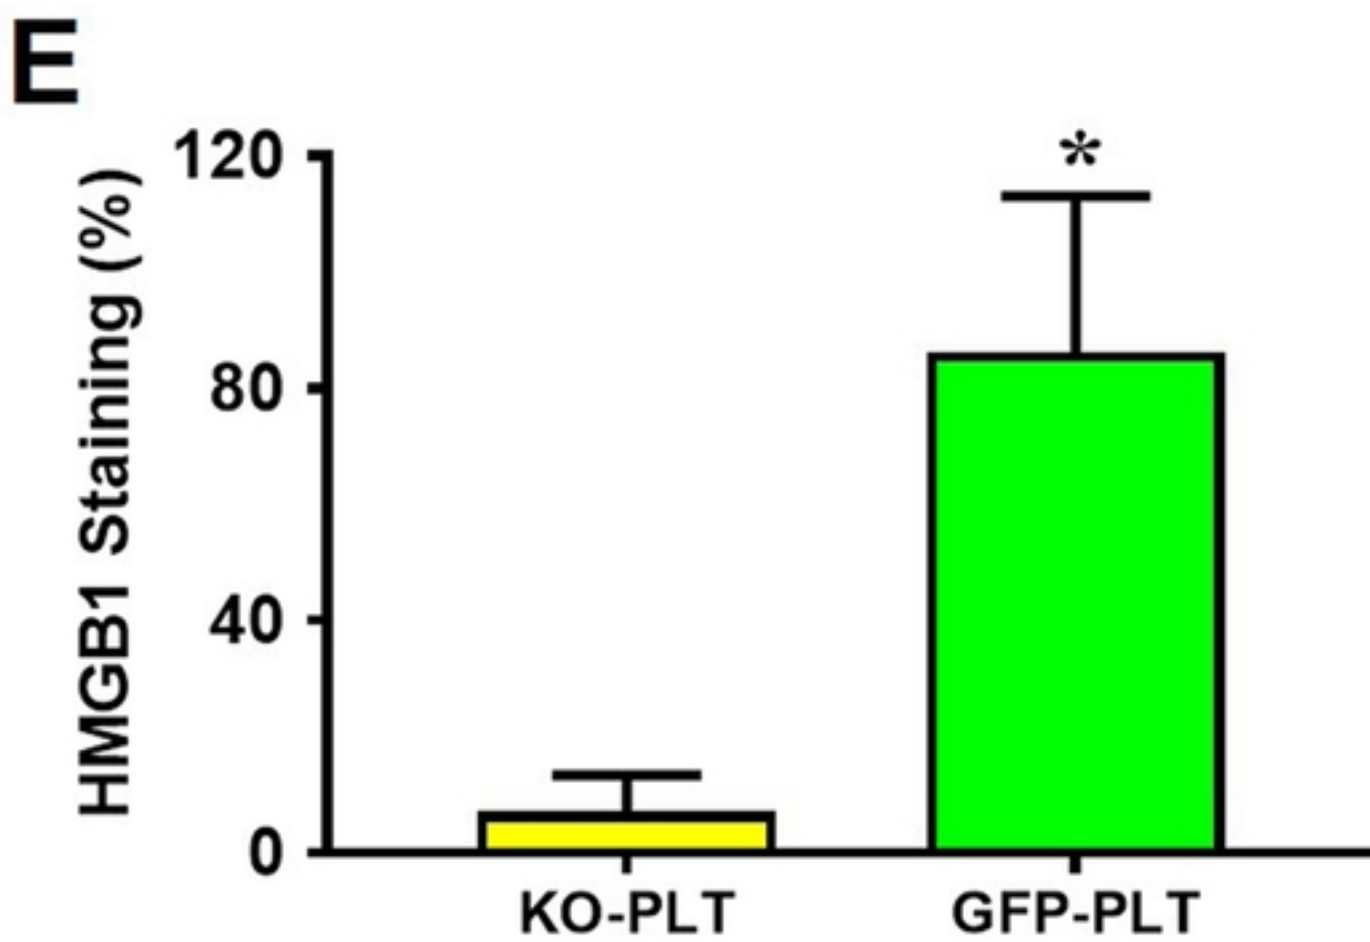

Fig1



**KO mice**

**GFP mice**

**Saline**

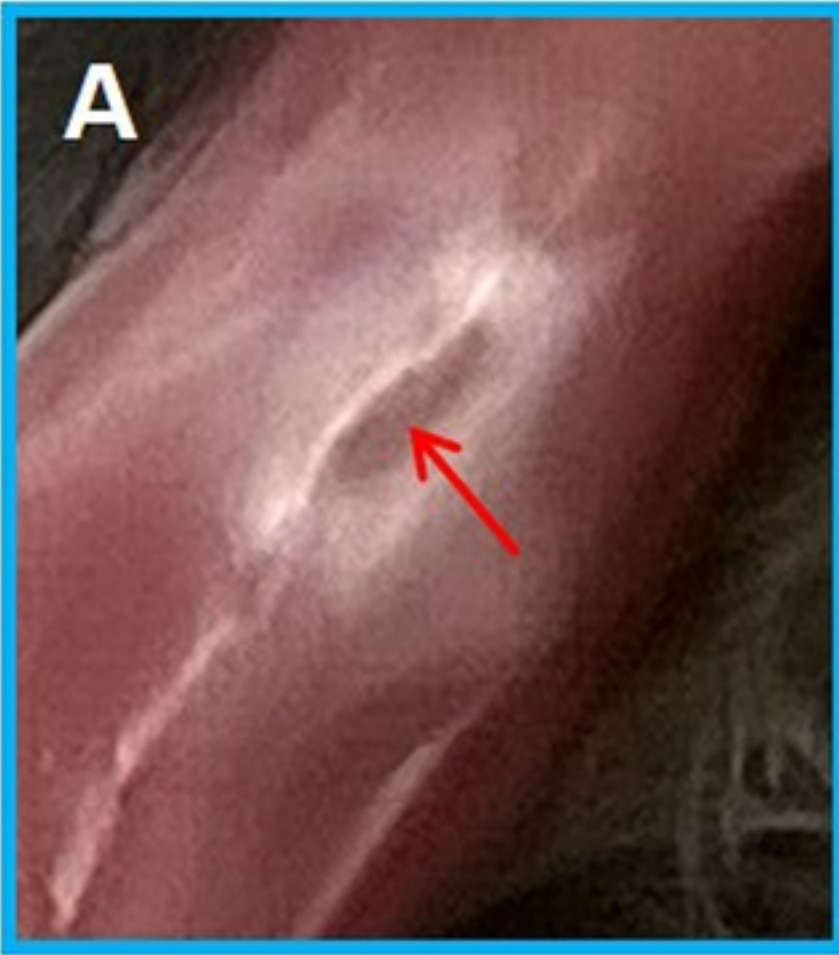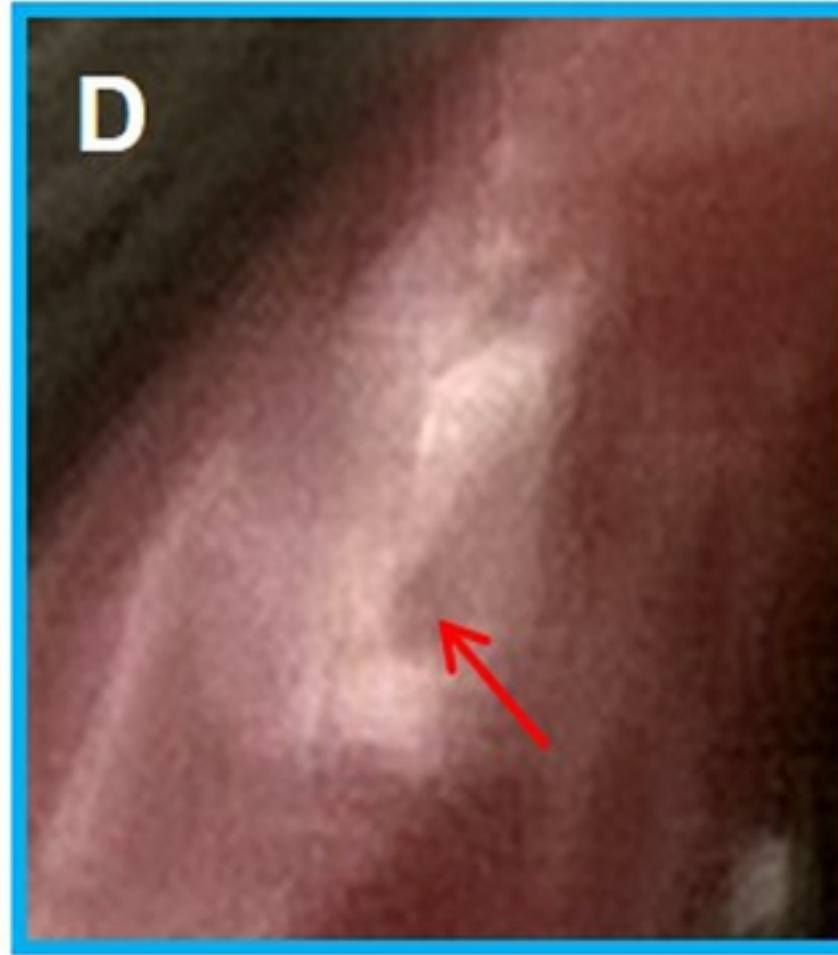

**KO-PRP**

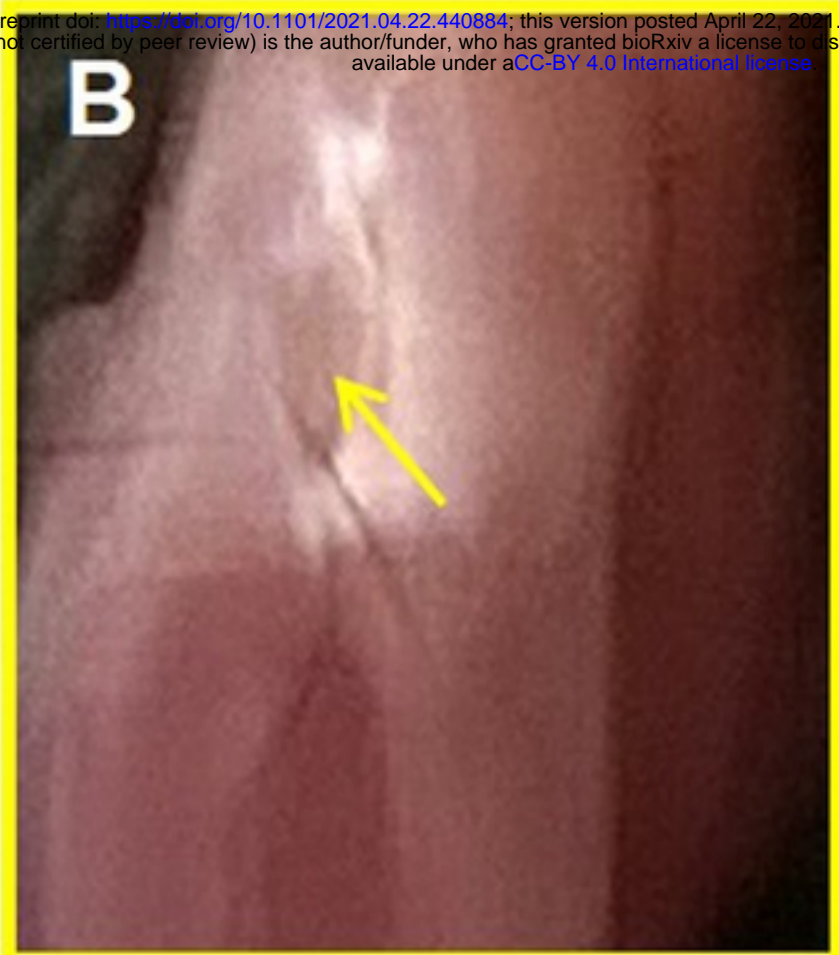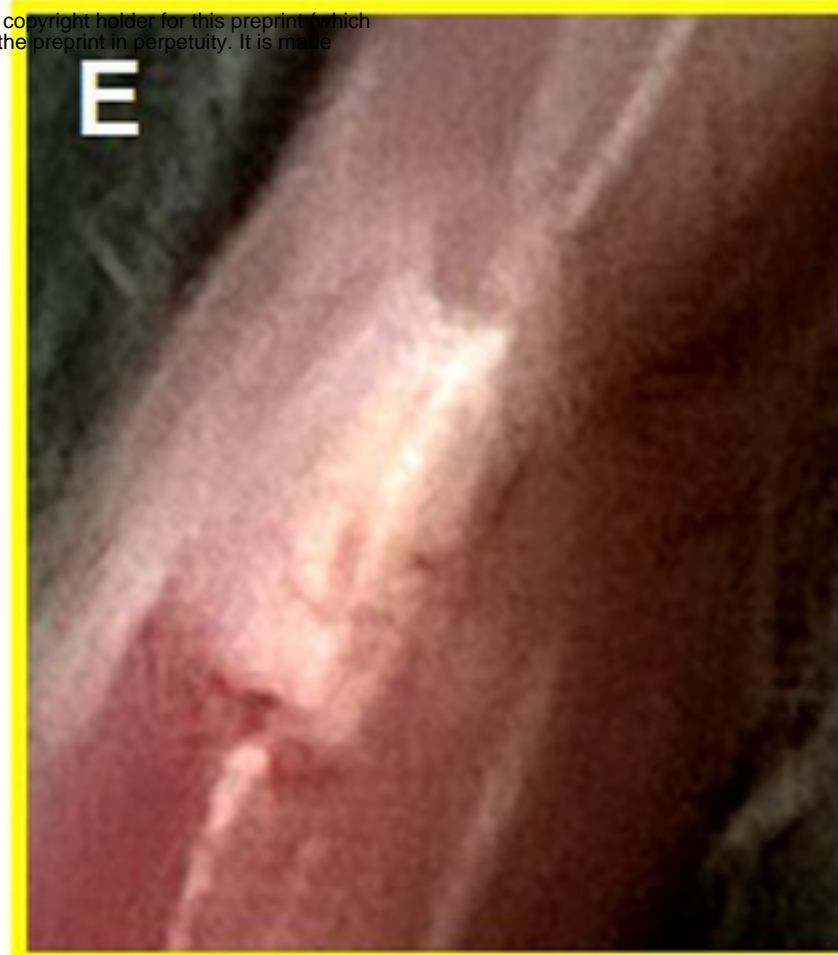

**GFP-PRP**

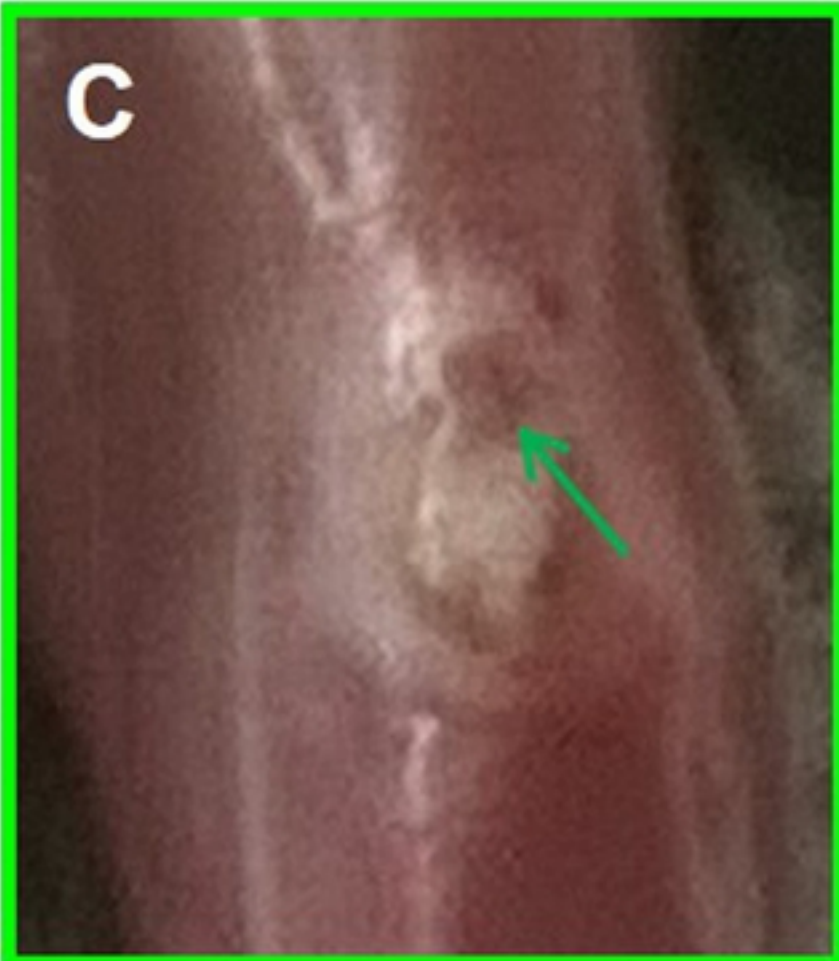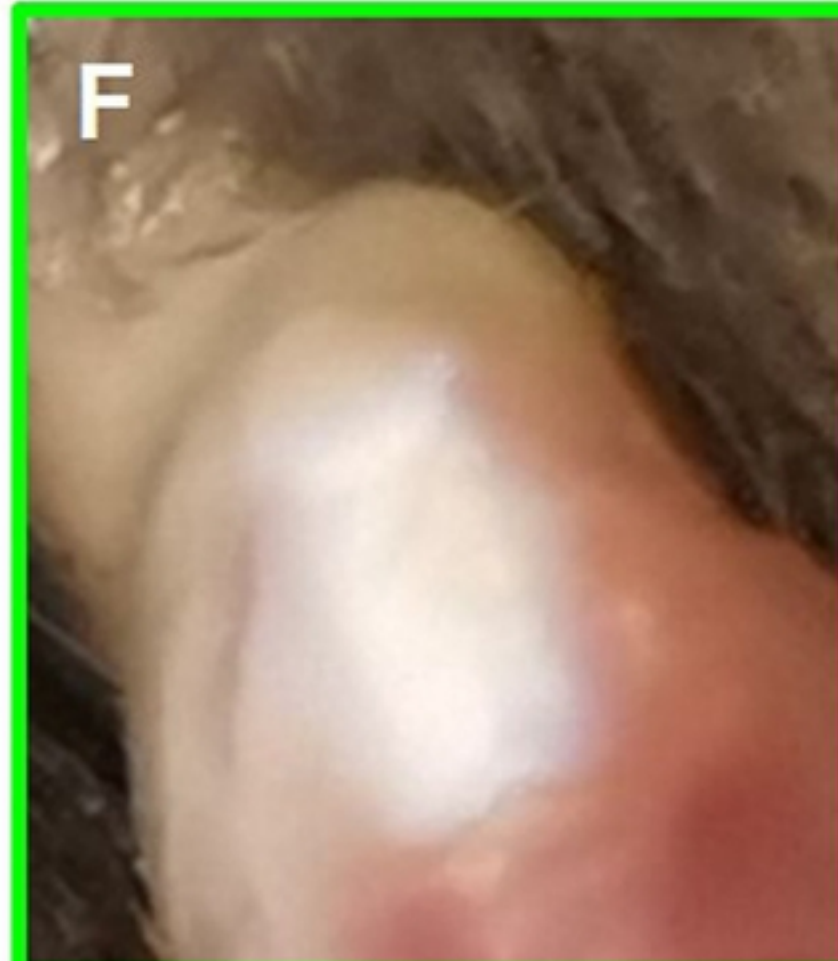

bioRxiv preprint doi: <https://doi.org/10.1101/2021.04.22.440884>; this version posted April 22, 2021. The copyright holder for this preprint (which was not certified by peer review) is the author/funder, who has granted bioRxiv a license to display the preprint in perpetuity. It is made available under aCC-BY 4.0 International license.

Fig2







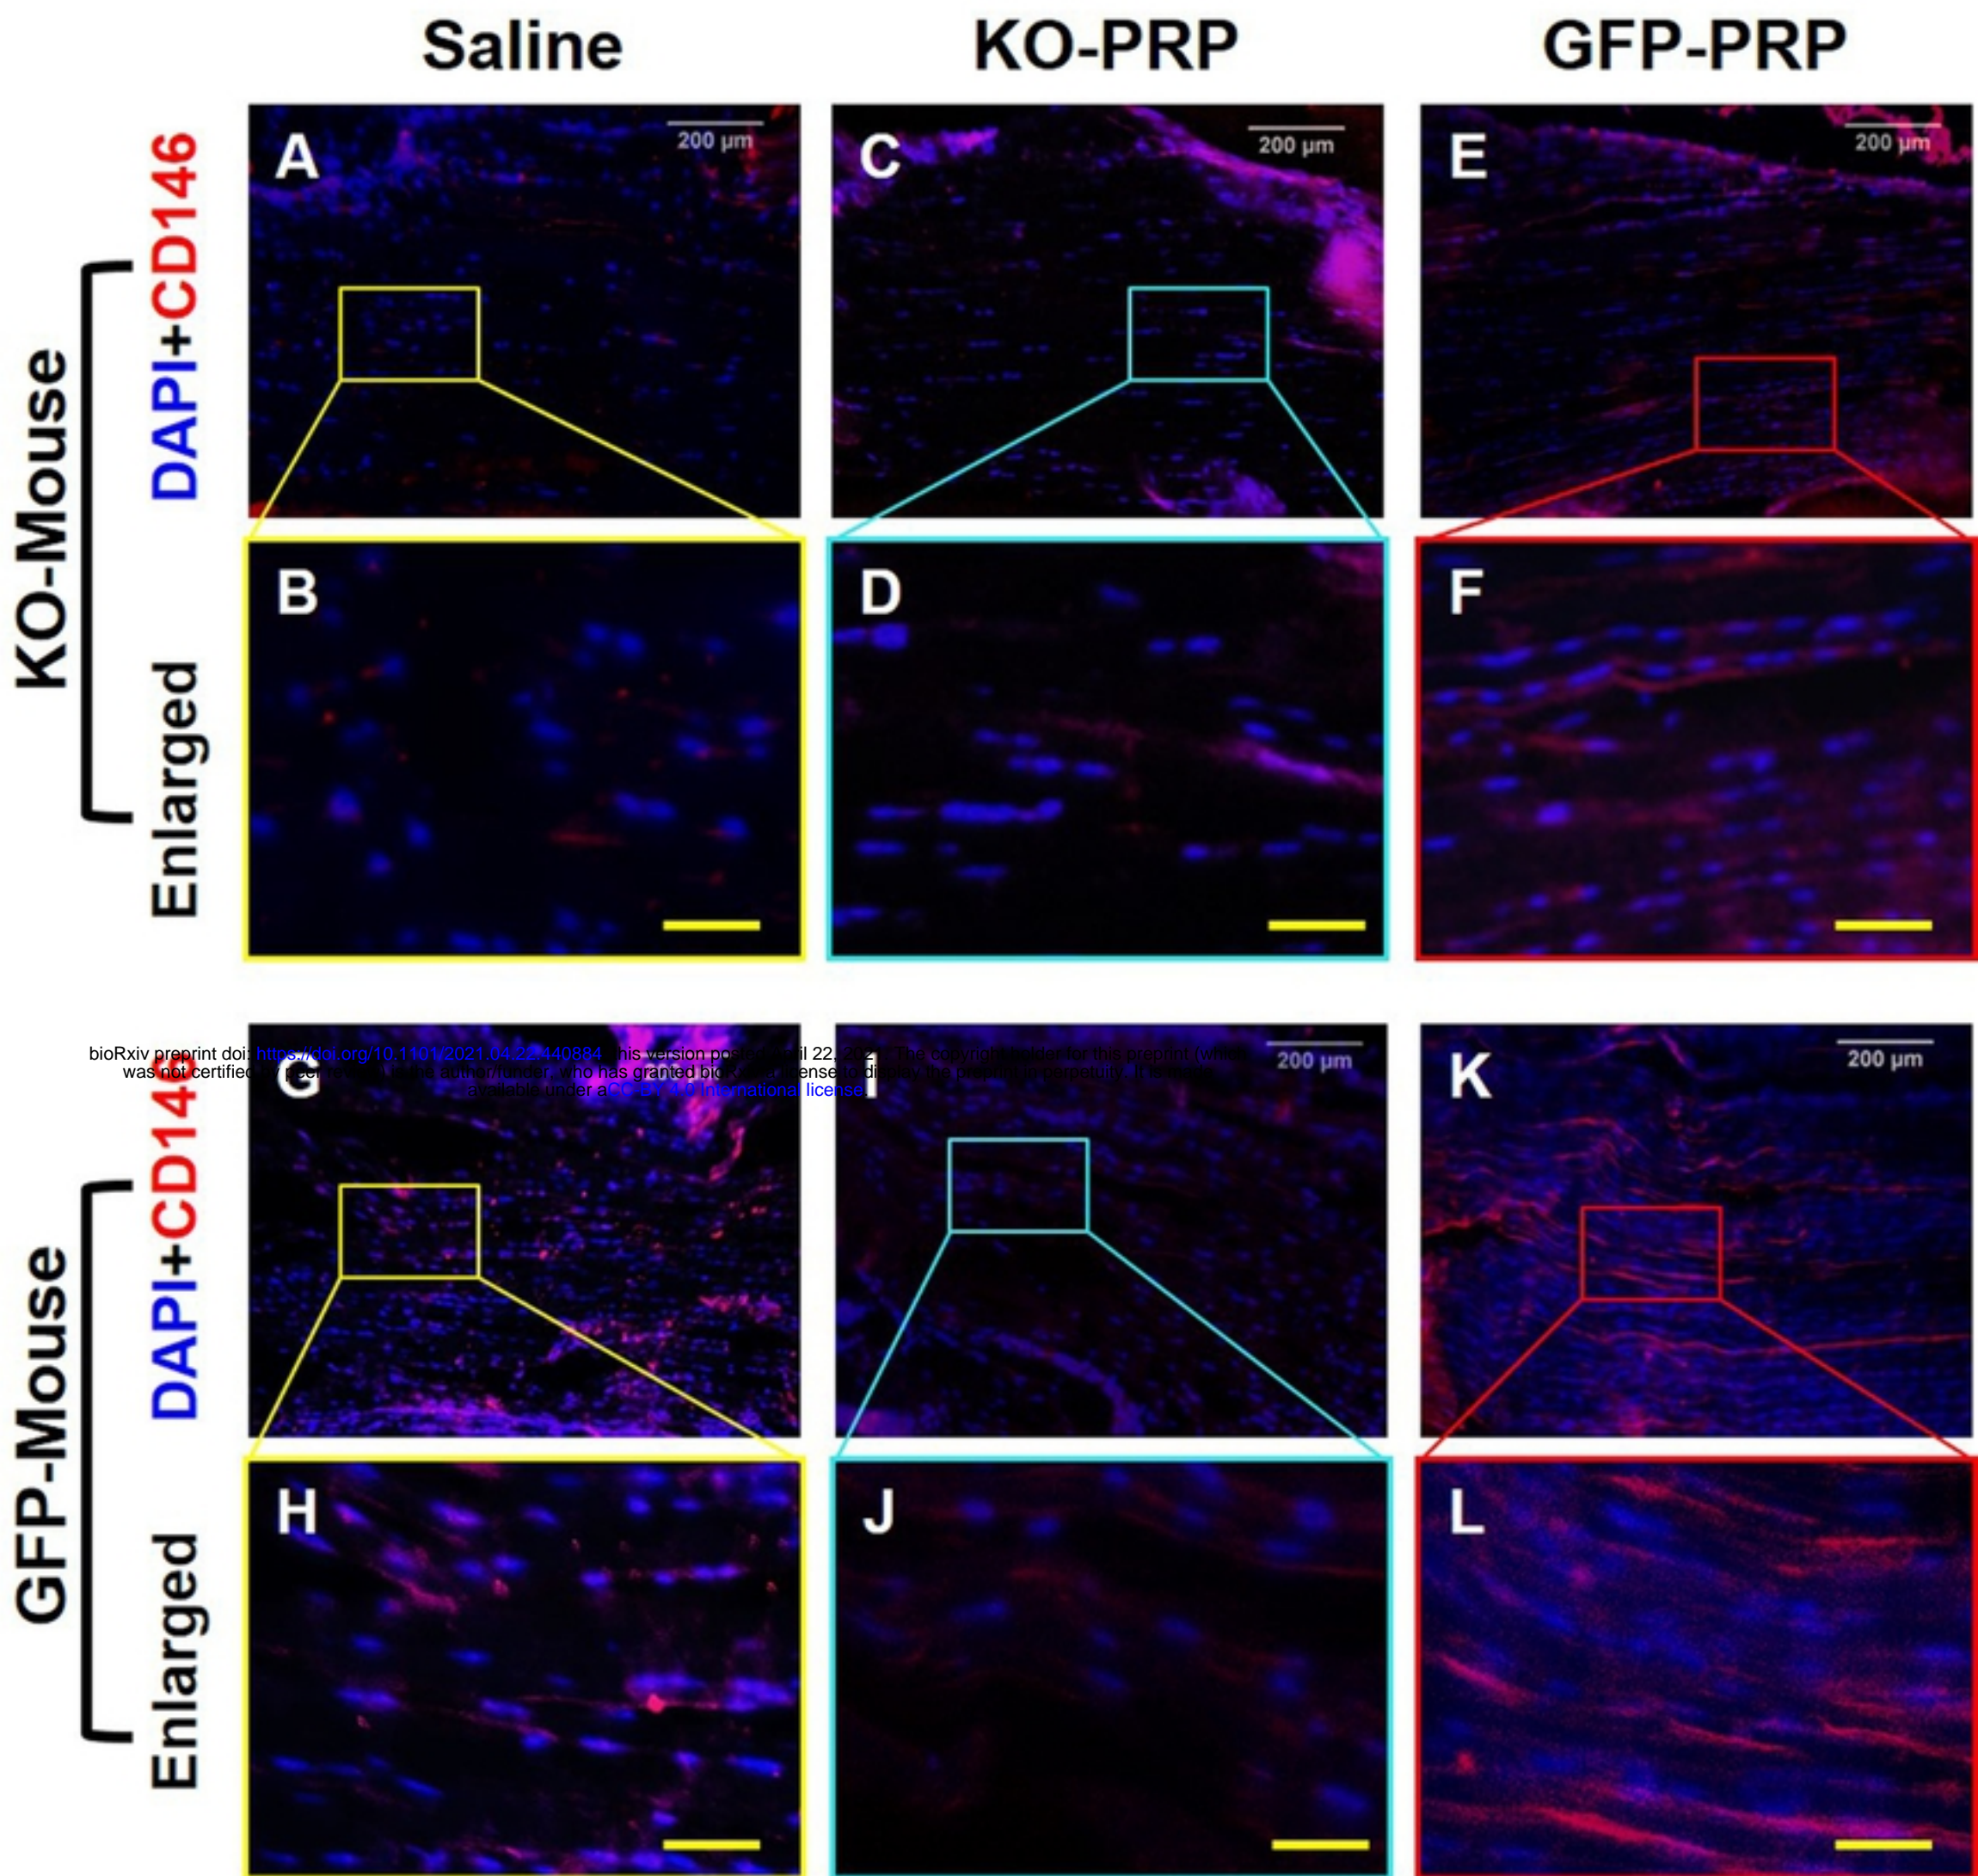

bioRxiv preprint doi: <https://doi.org/10.1101/2021.04.22.440884>; this version posted April 22, 2021. The copyright holder for this preprint (which was not certified by peer review) is the author/funder, who has granted bioRxiv a license to display the preprint in perpetuity. It is made available under aCC-BY 4.0 International license.

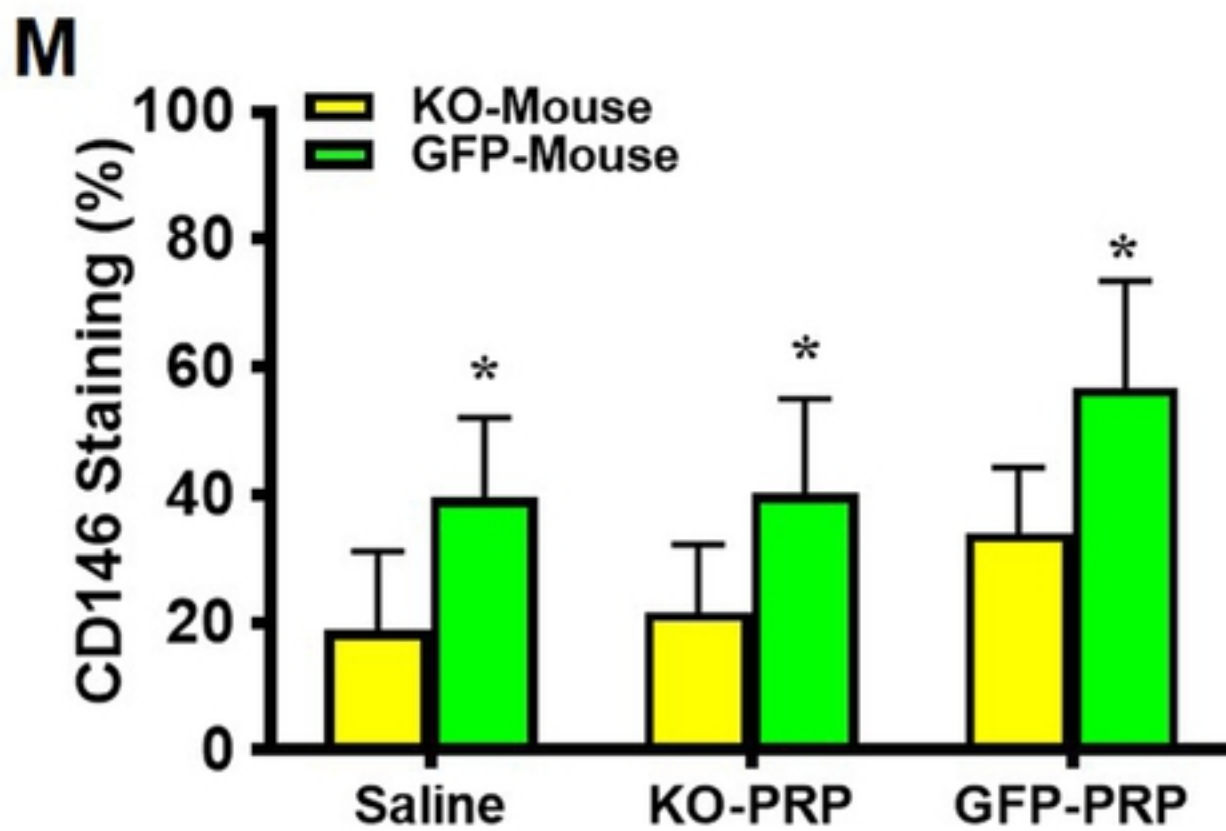

Fig6



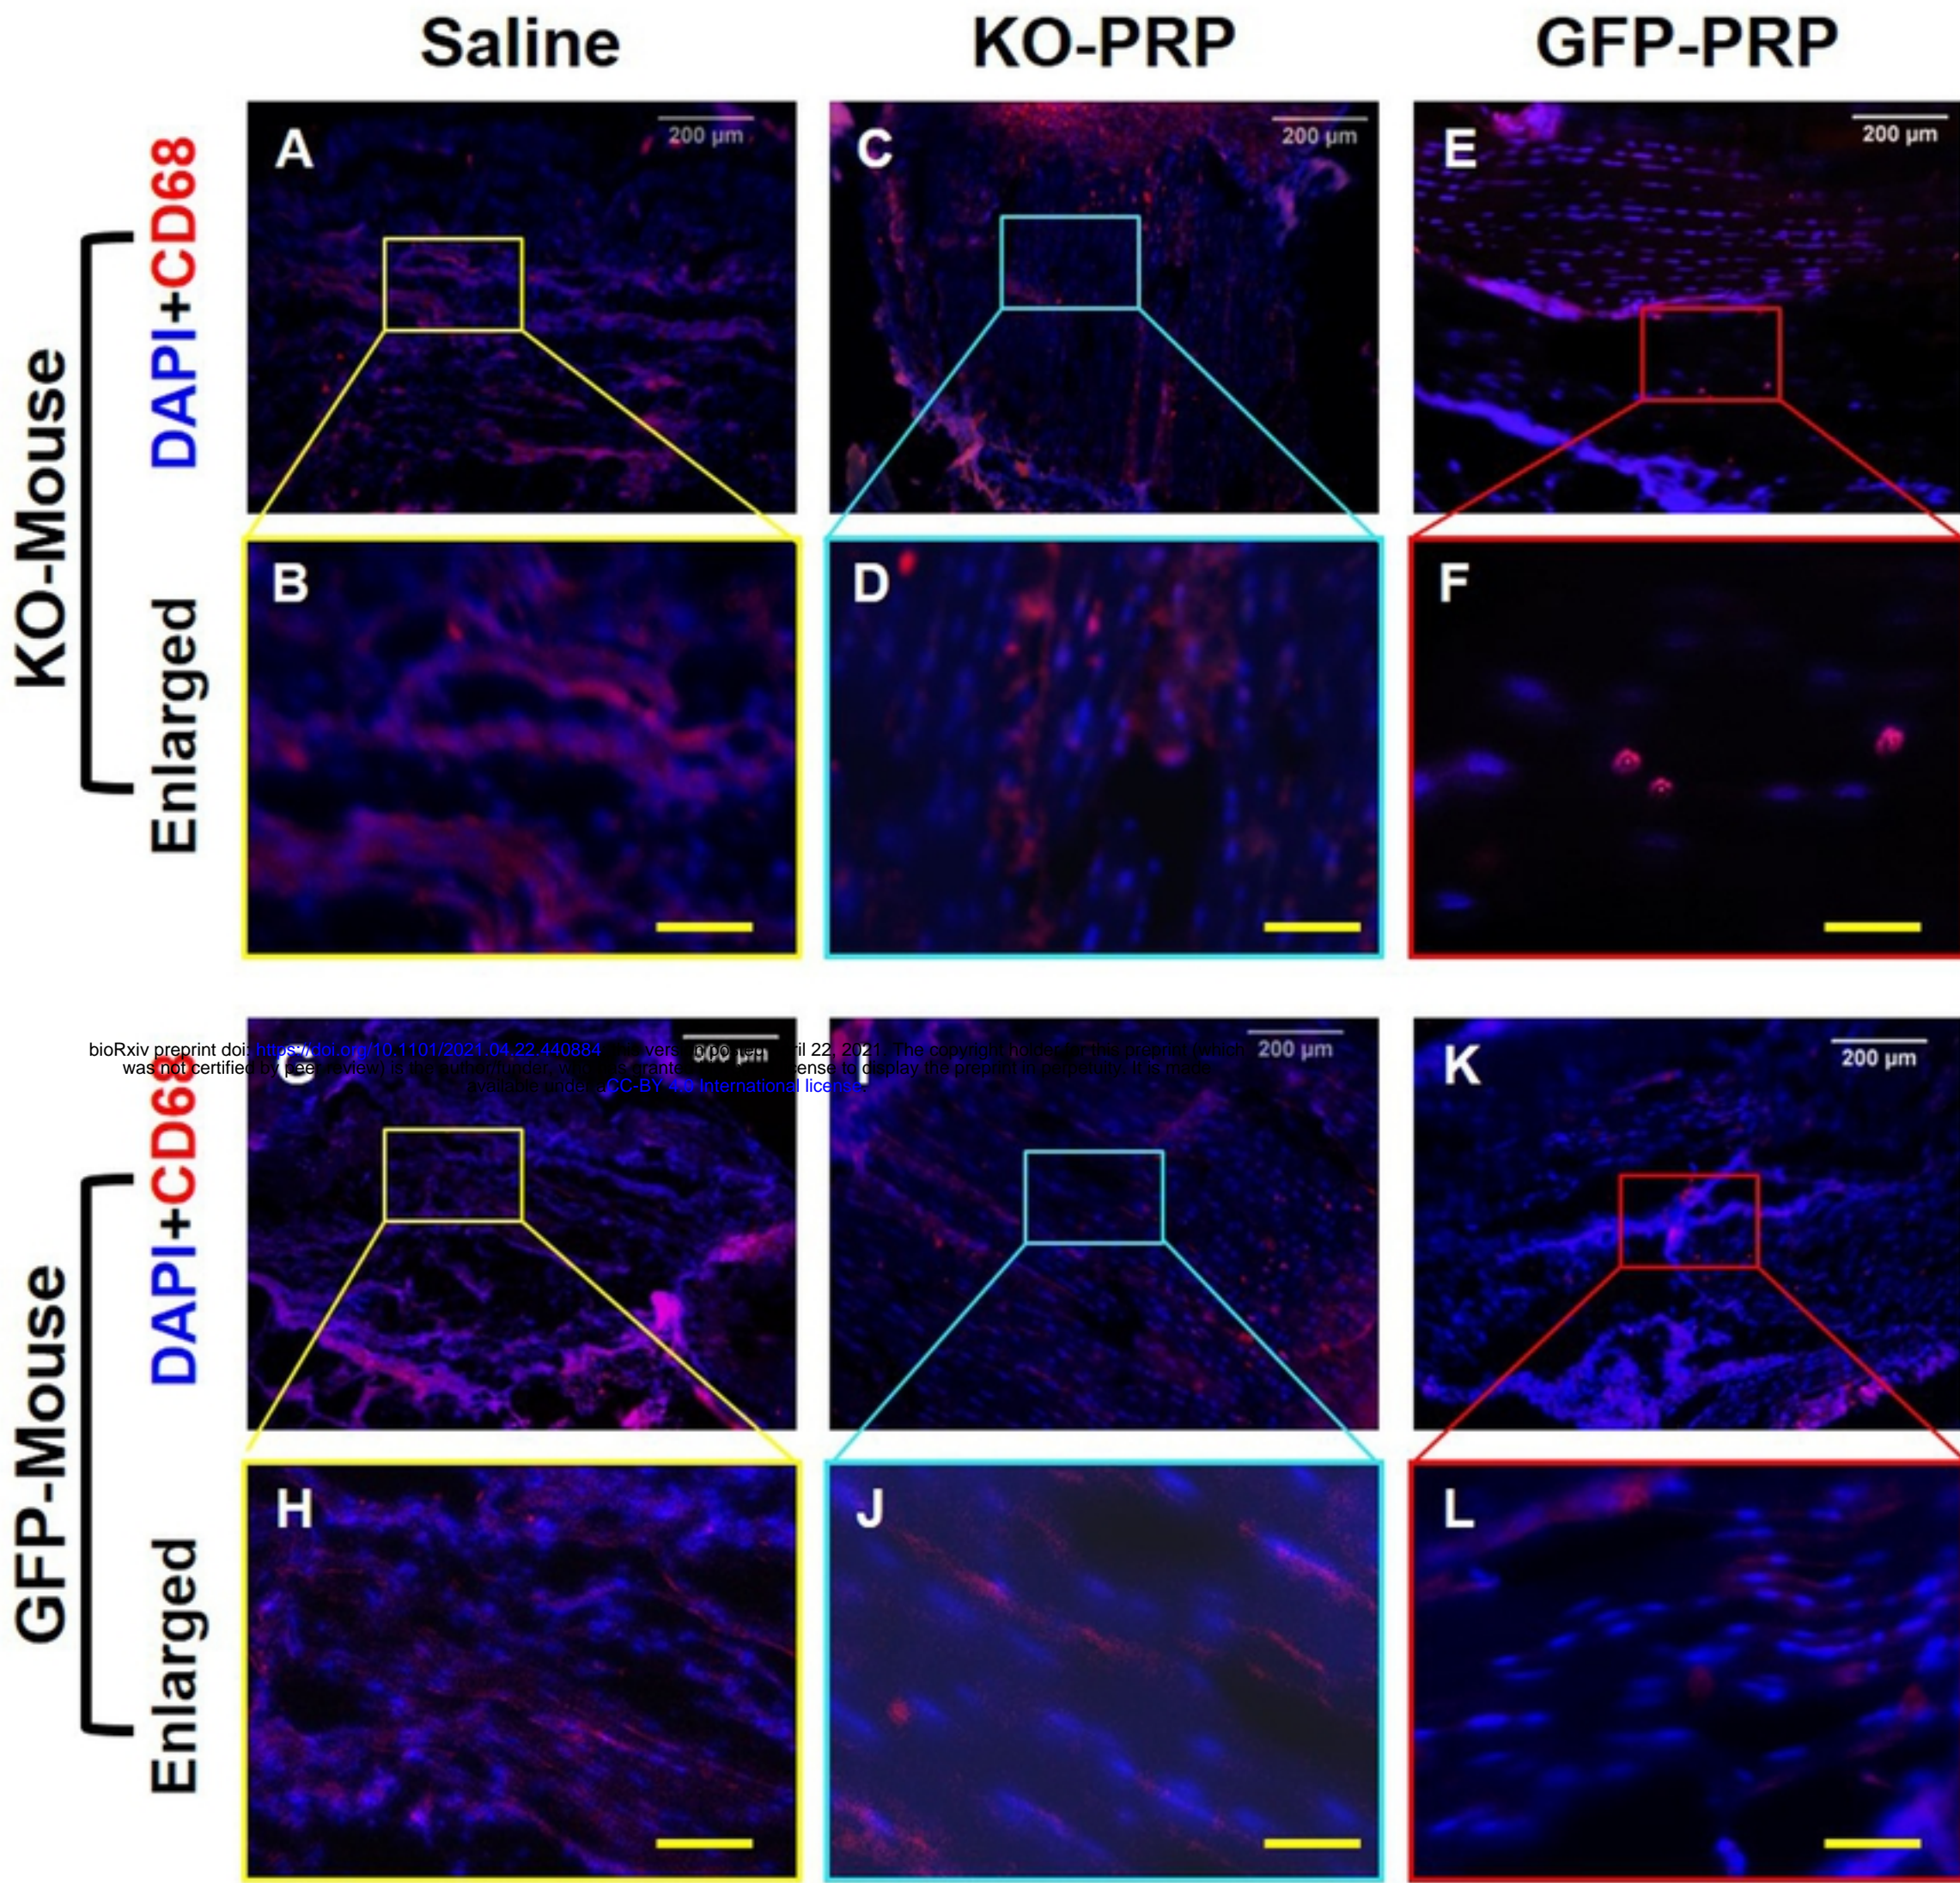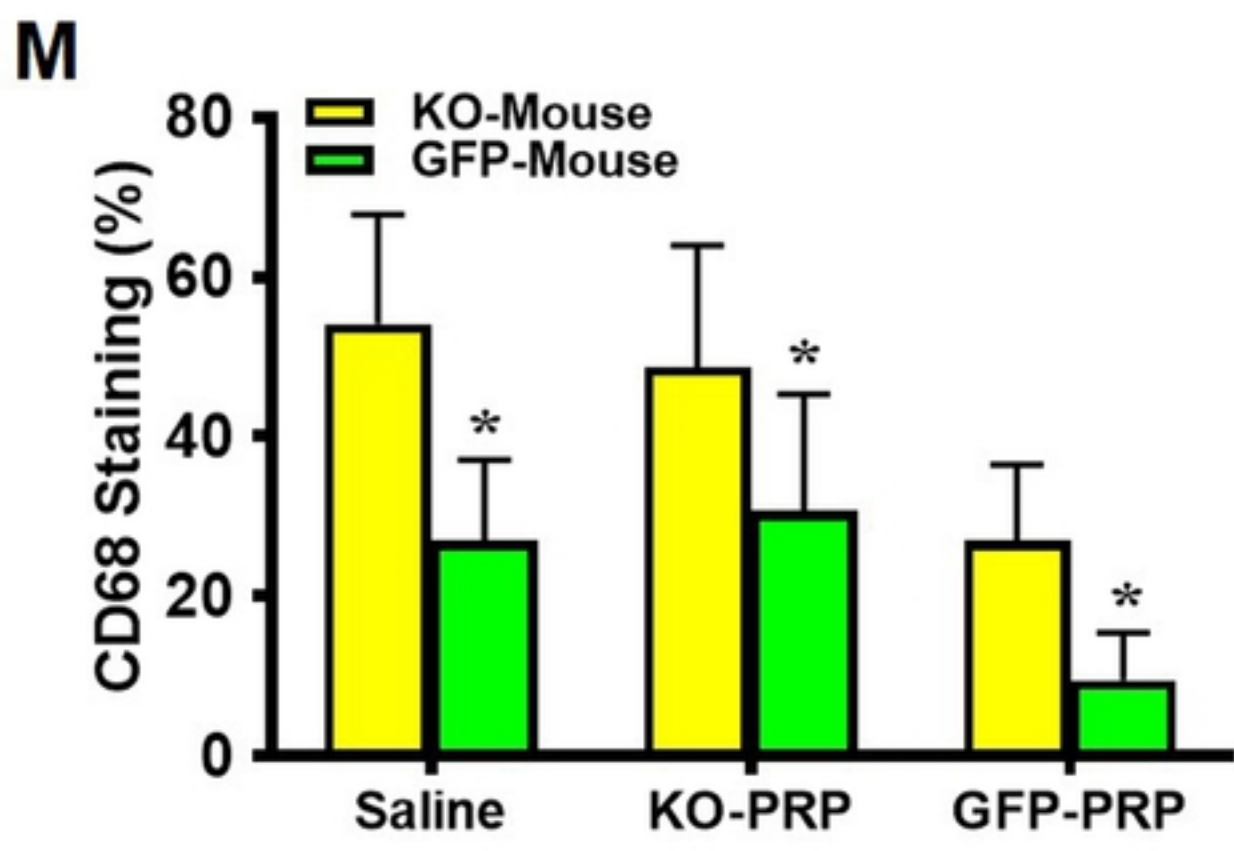

Fig5



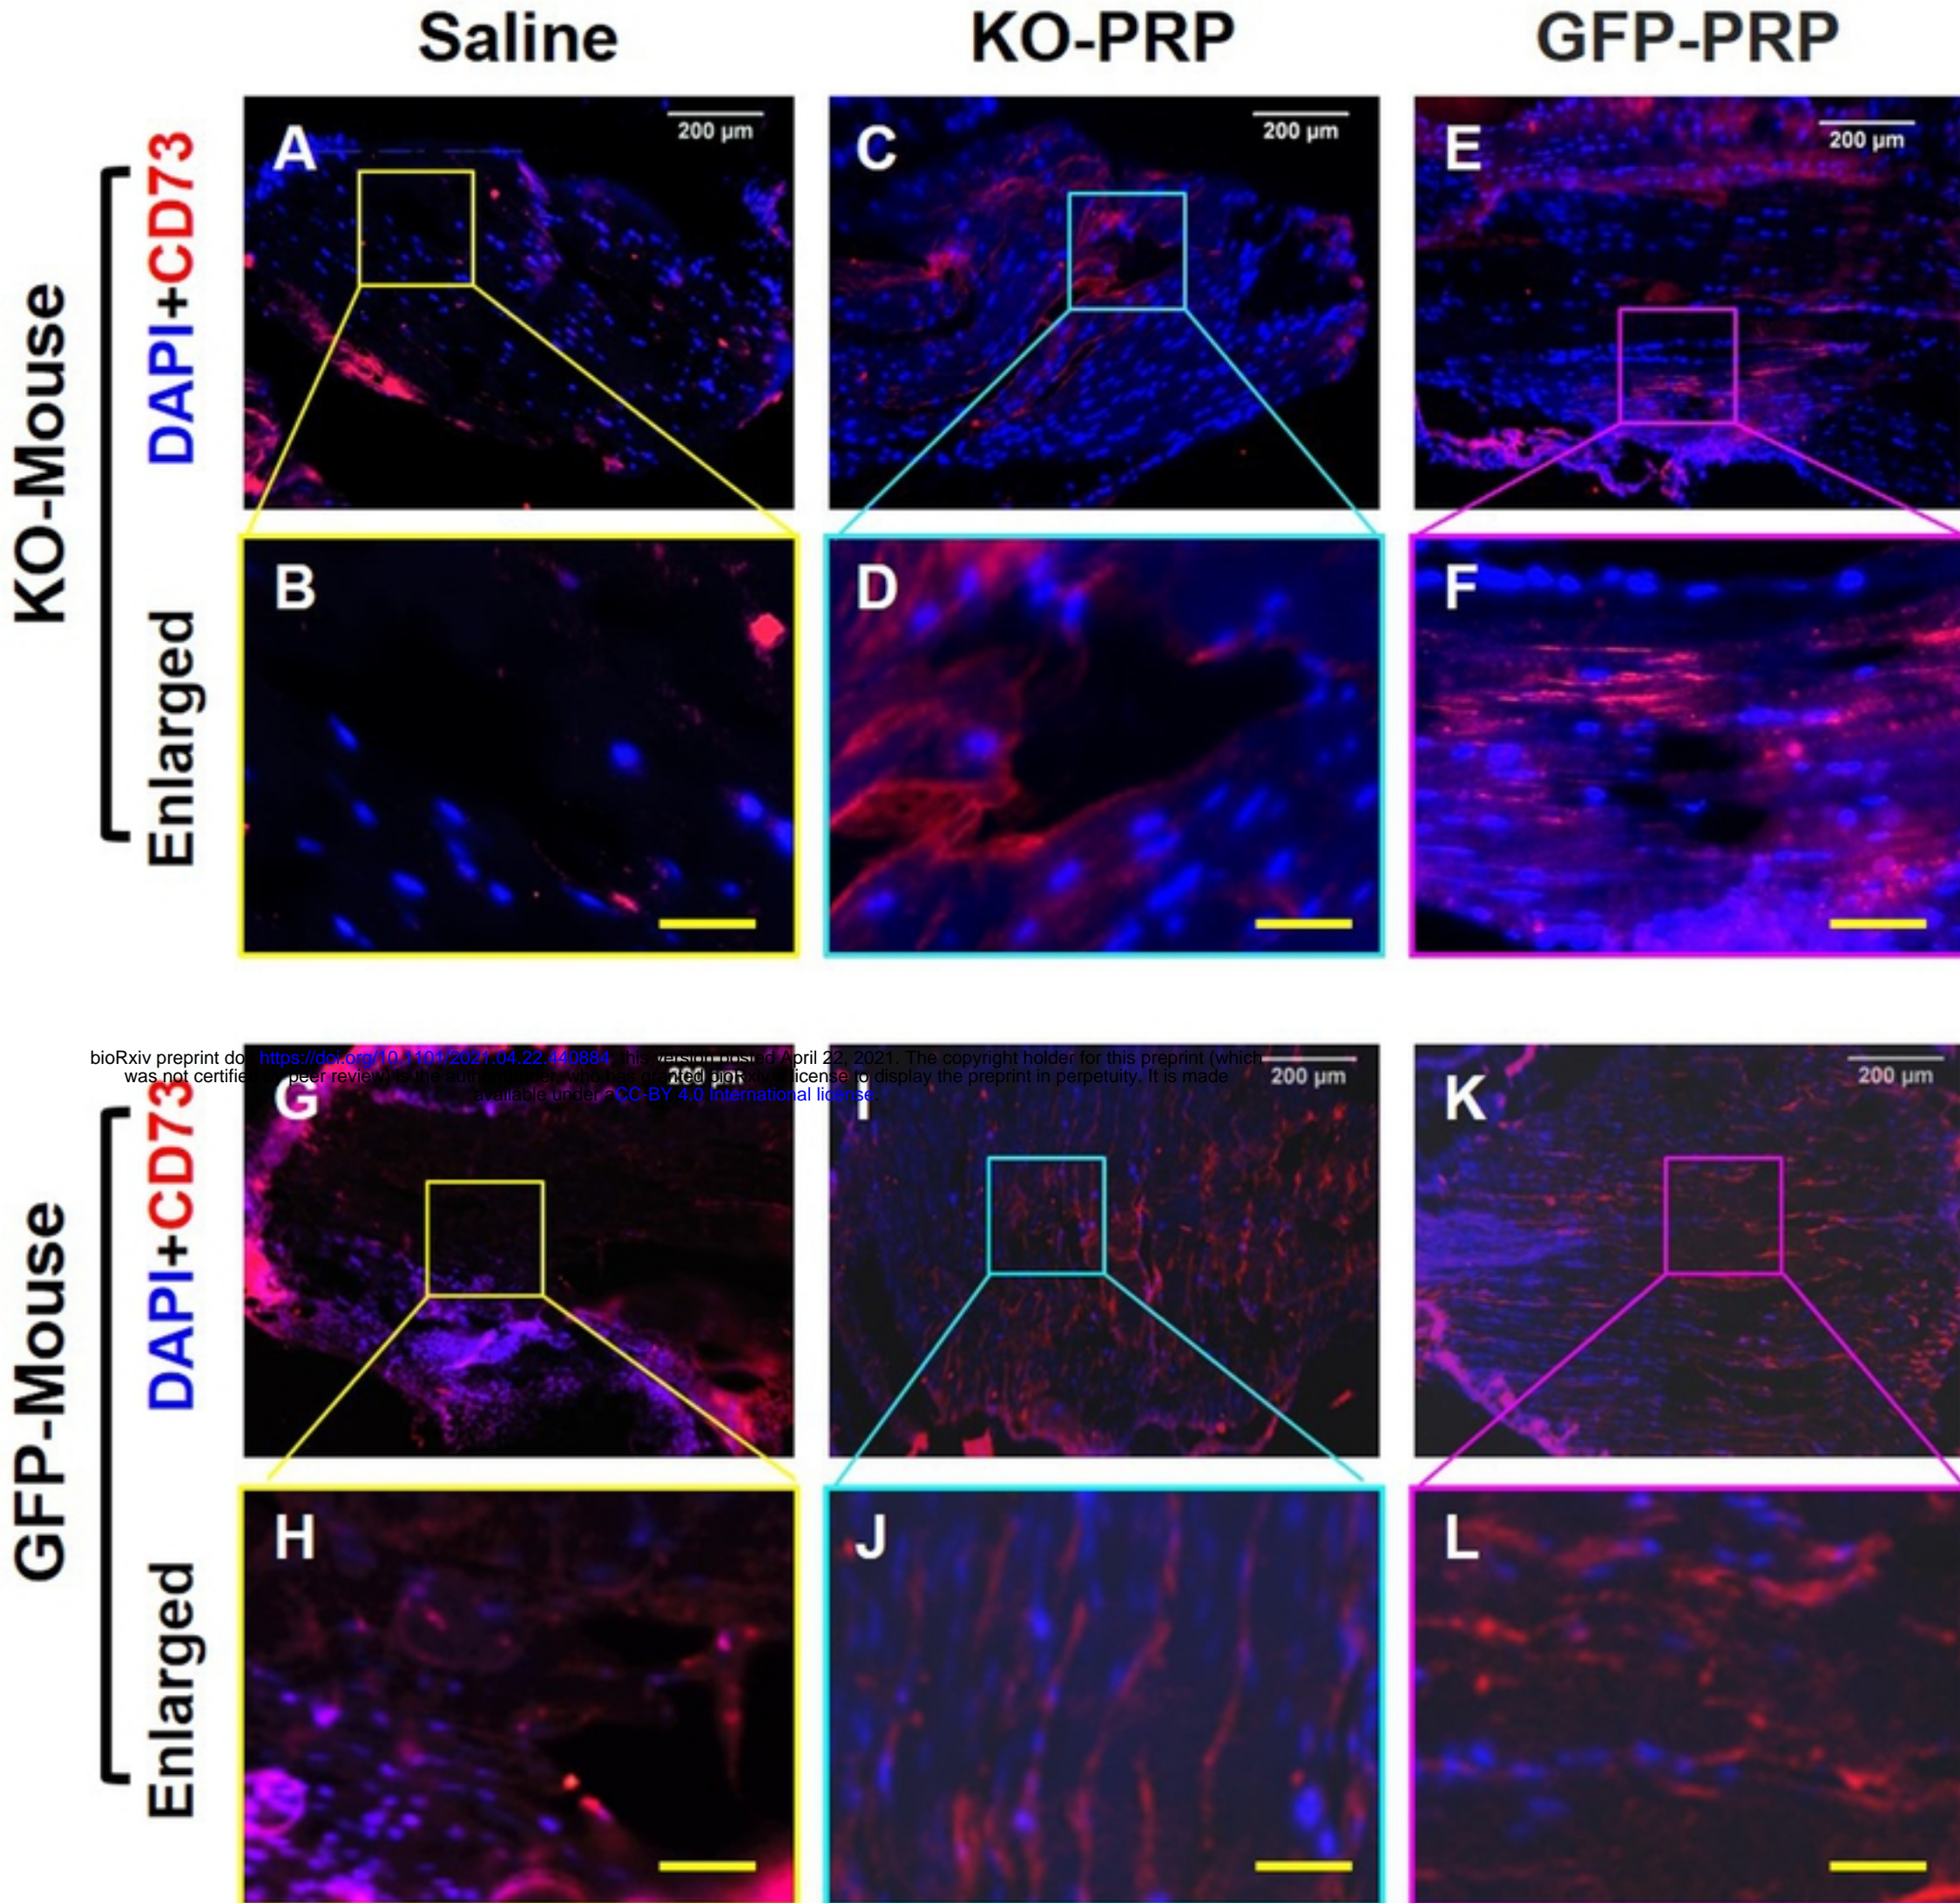

bioRxiv preprint doi: <https://doi.org/10.1101/2021.04.22.440884>; this version posted April 22, 2021. The copyright holder for this preprint (which was not certified by peer review) is the author/funder, who has granted bioRxiv a license to display the preprint in perpetuity. It is made available under aCC-BY 4.0 International license.

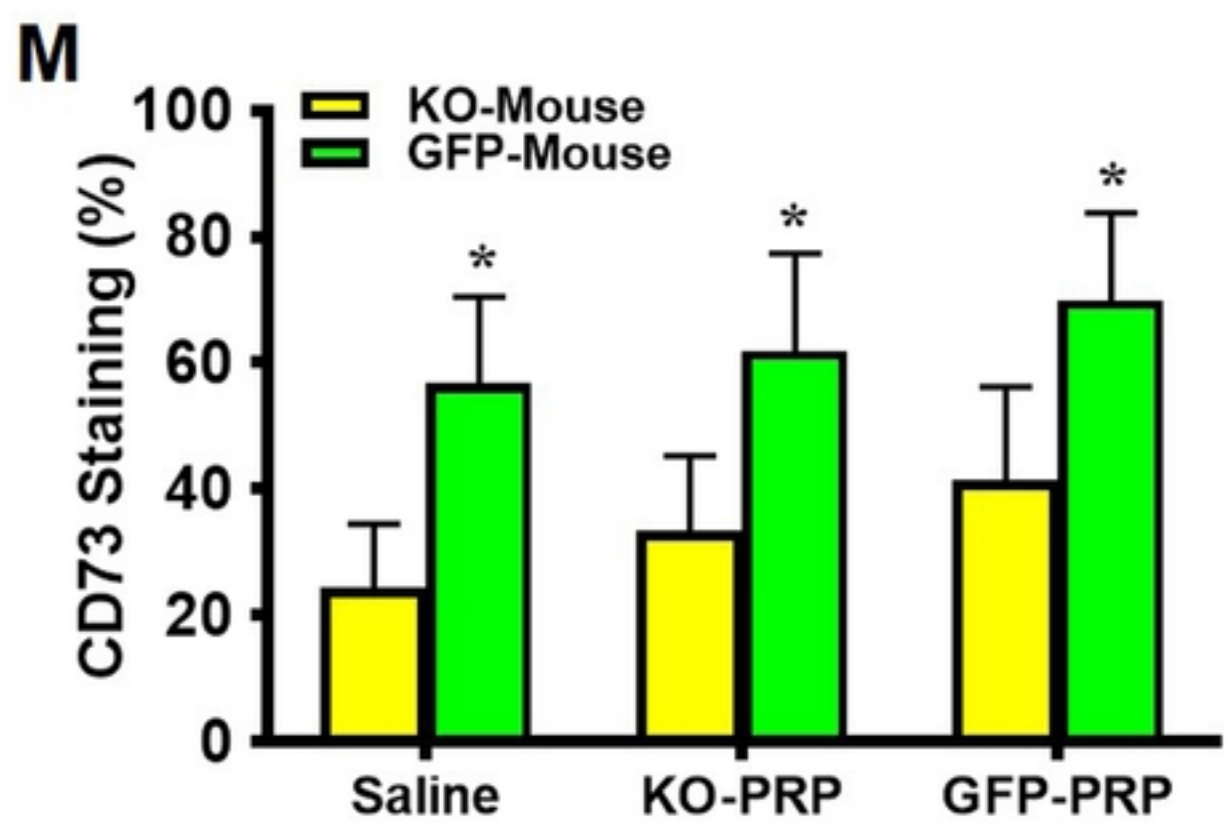

Fig7



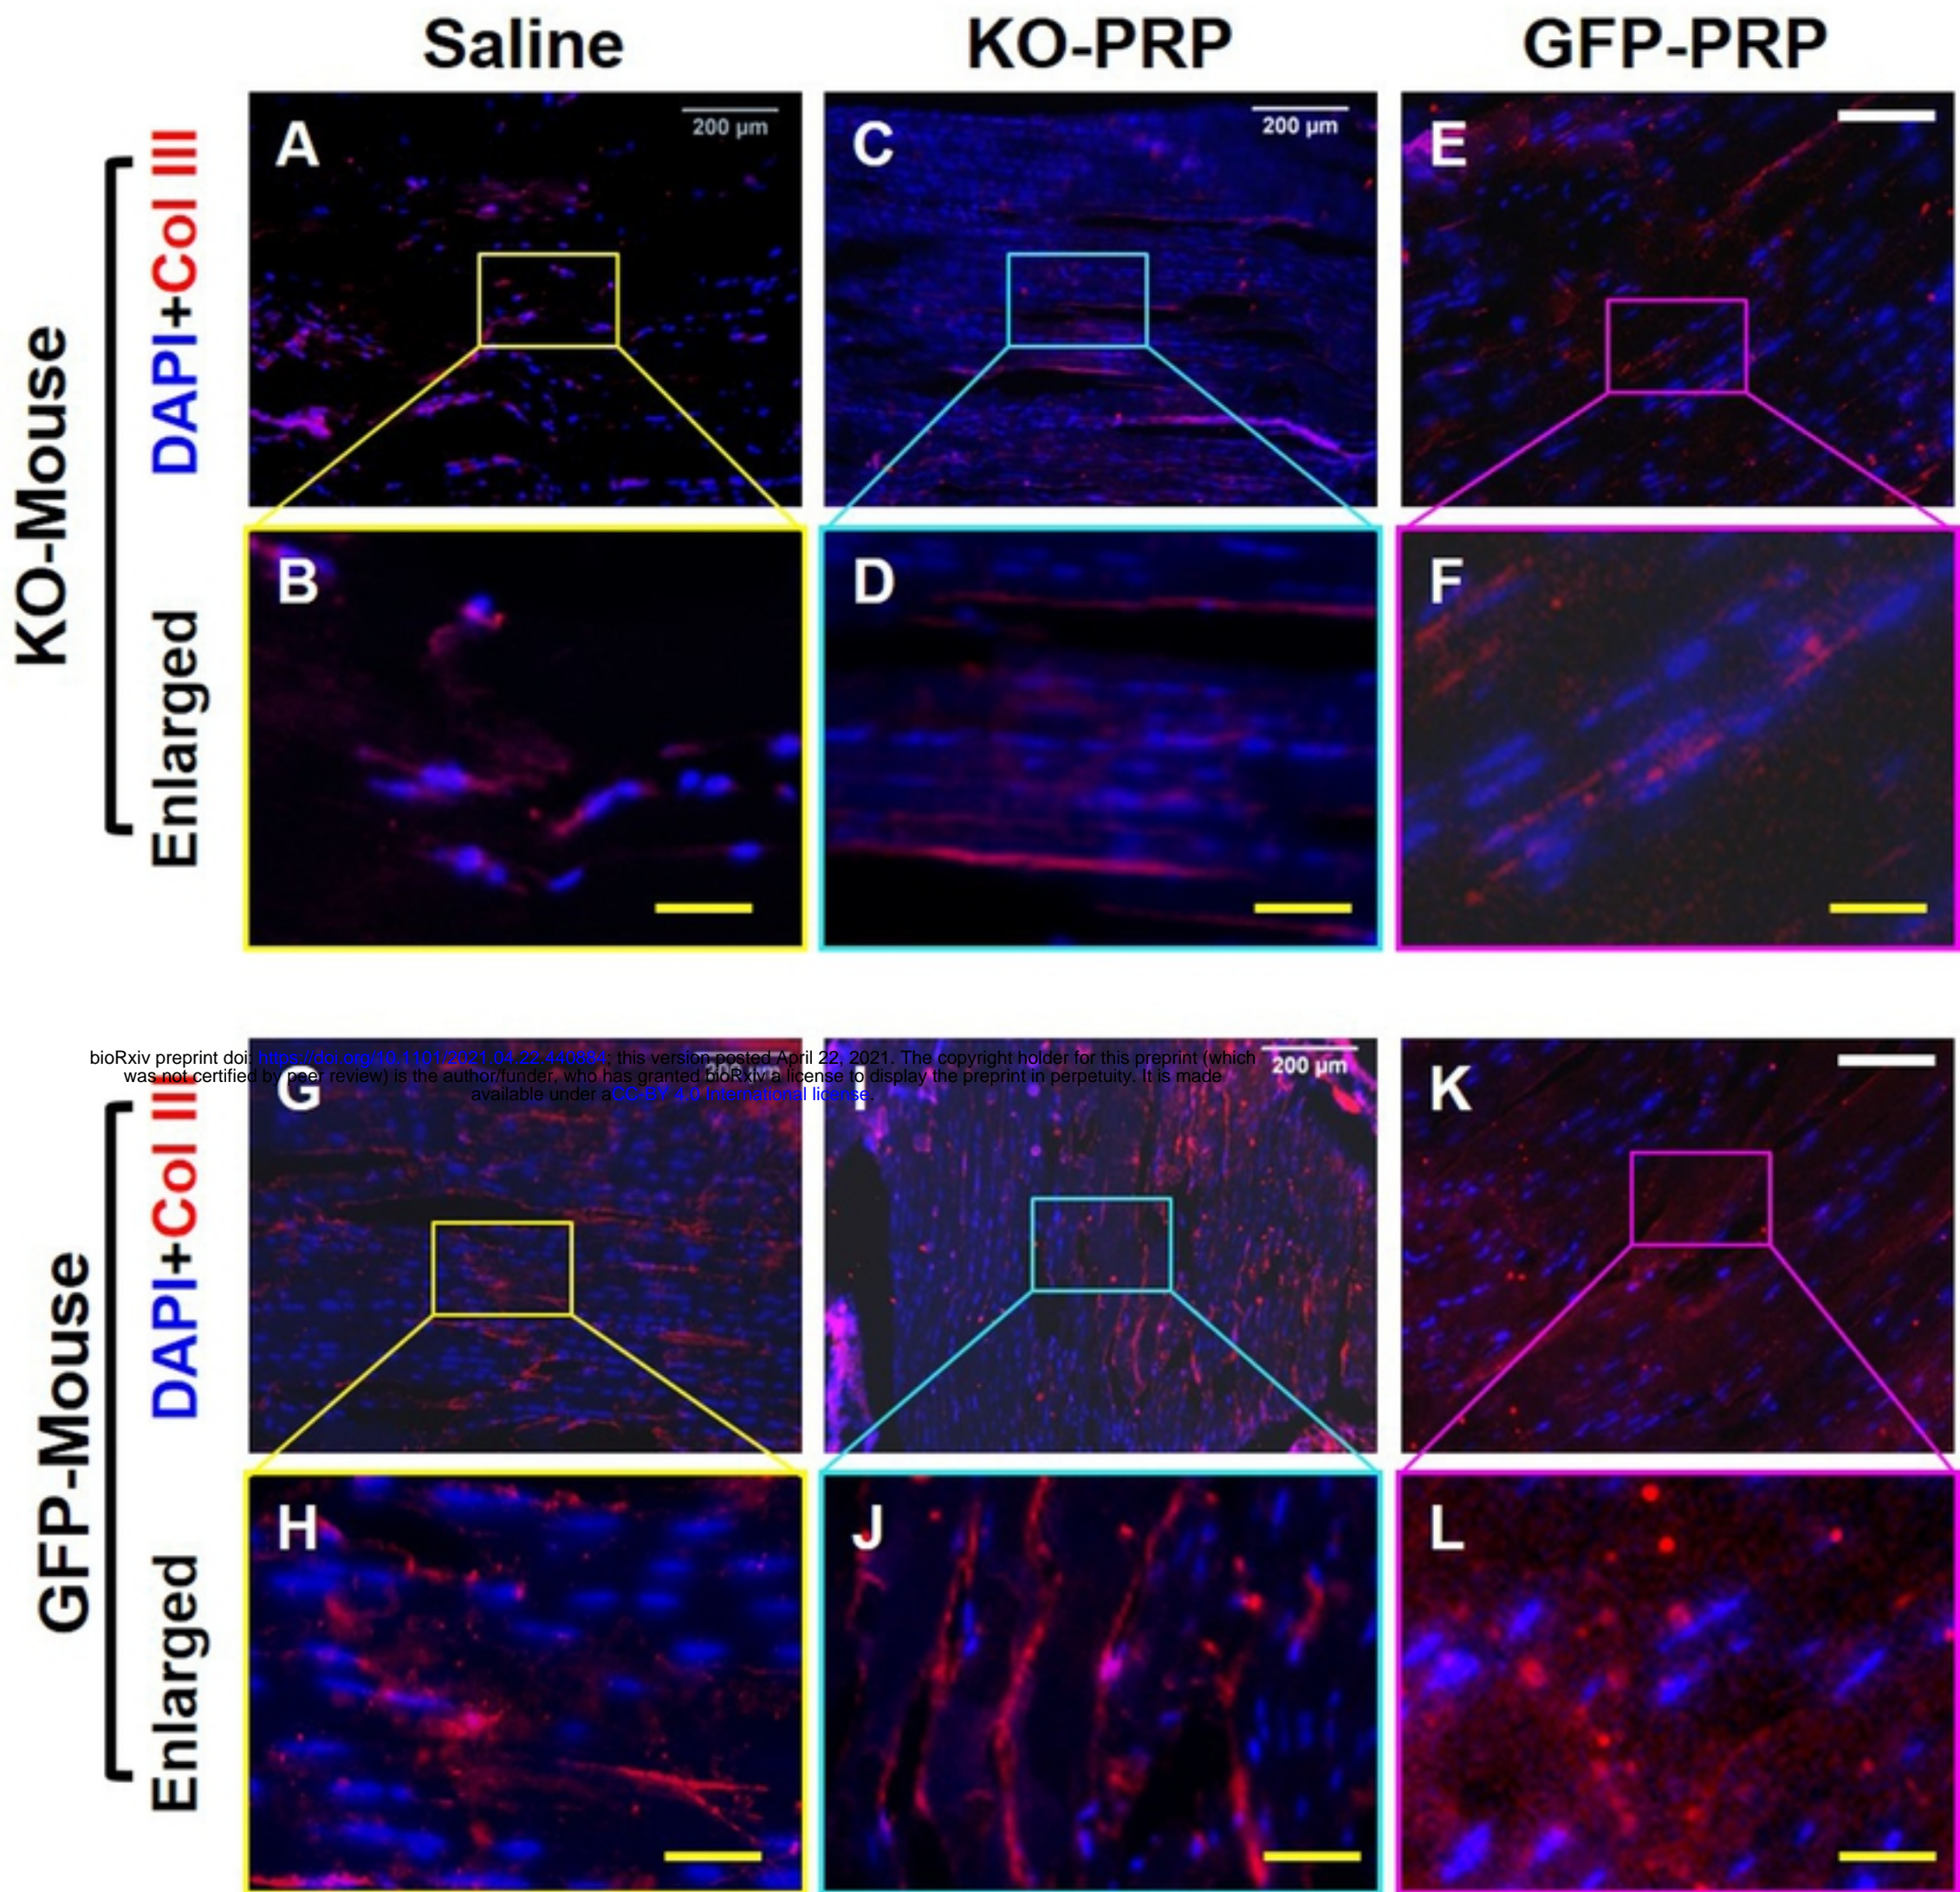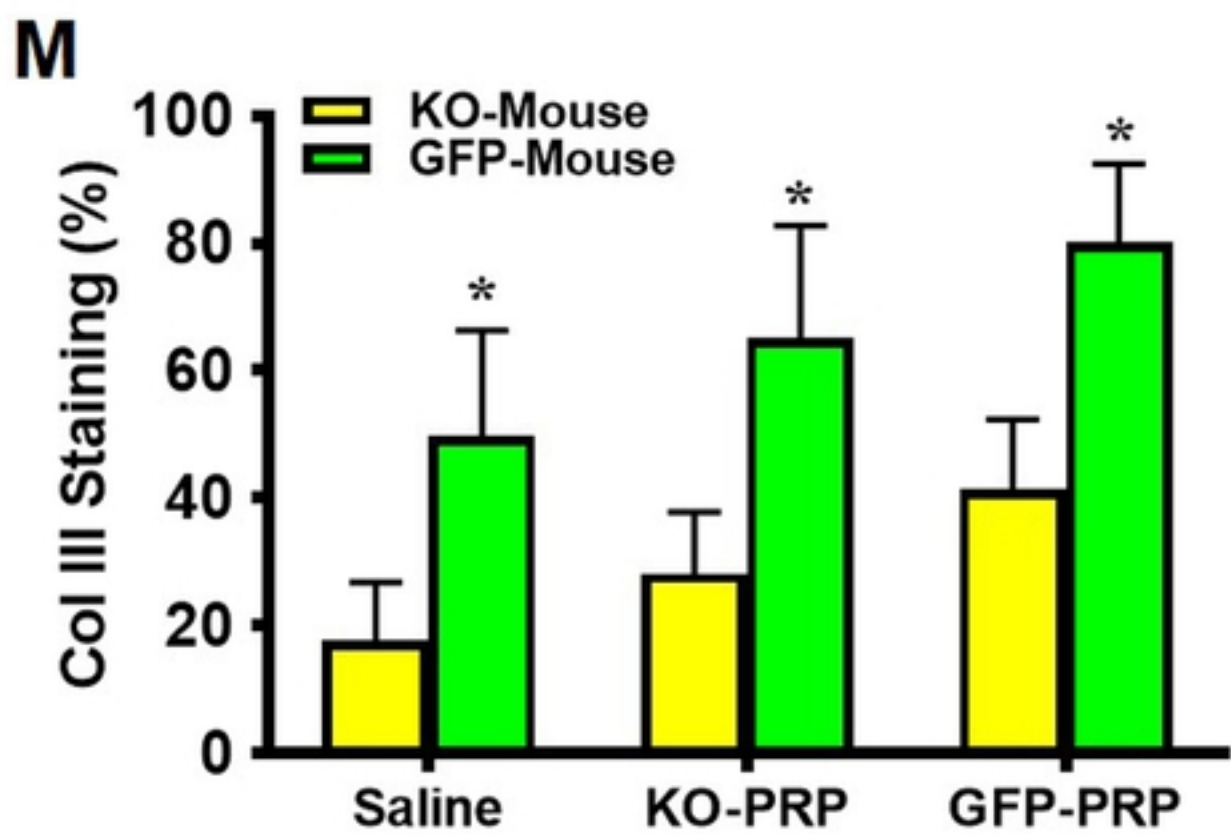

Fig8



**KO-Mouse****GFP-Mouse****Saline**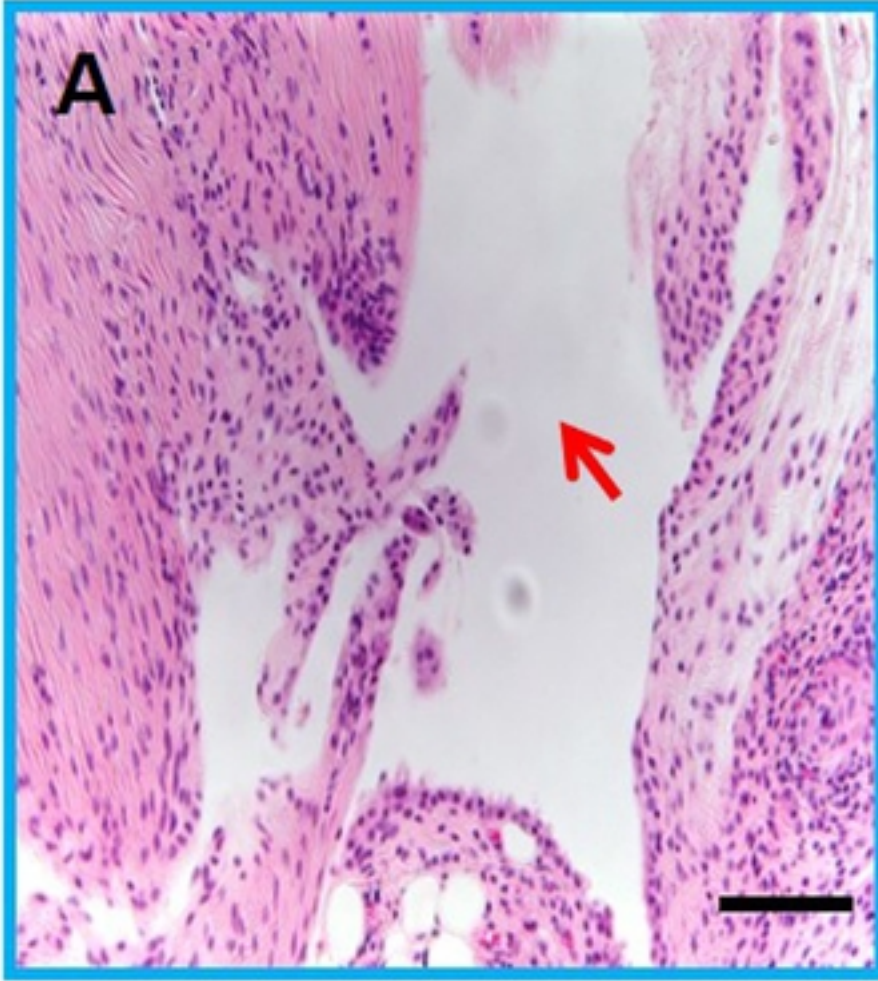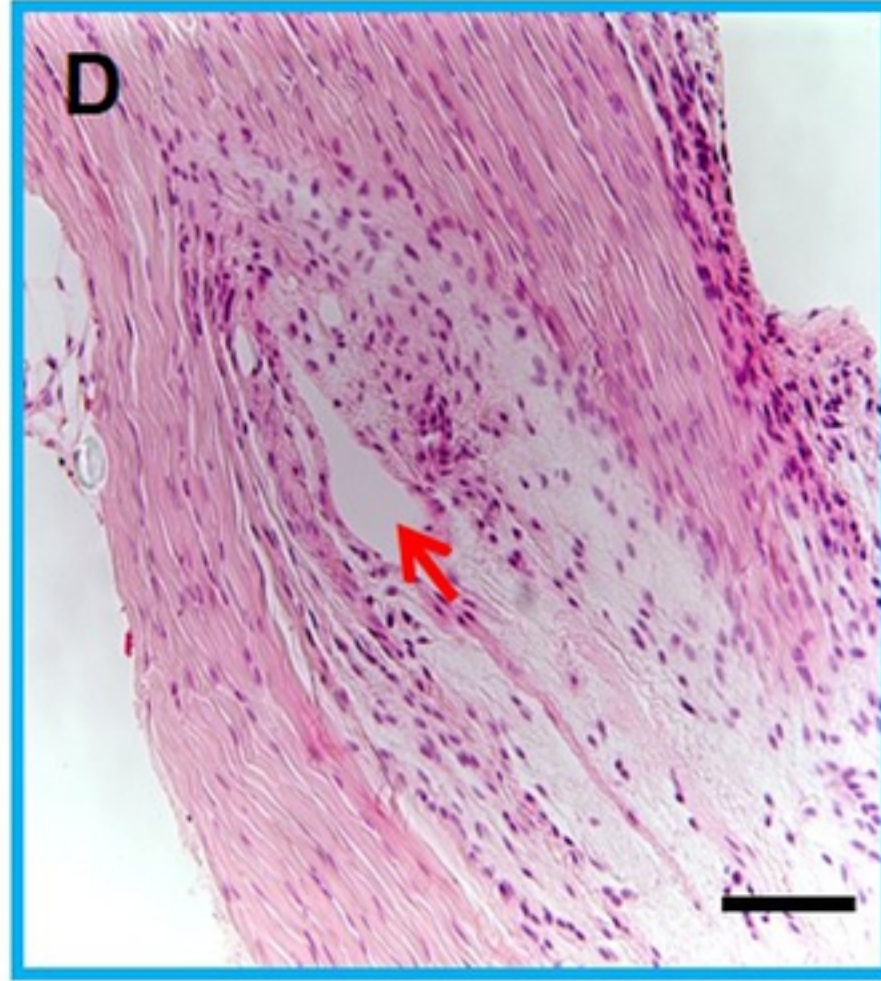

bioRxiv preprint doi: <https://doi.org/10.1101/2021.04.22.440884>; this version posted April 22, 2021. The copyright holder for this preprint (which was not certified by peer review) is the author/funder, who has granted bioRxiv a license to display the preprint in perpetuity. It is made available under aCC-BY 4.0 International license.

**KO-PRP**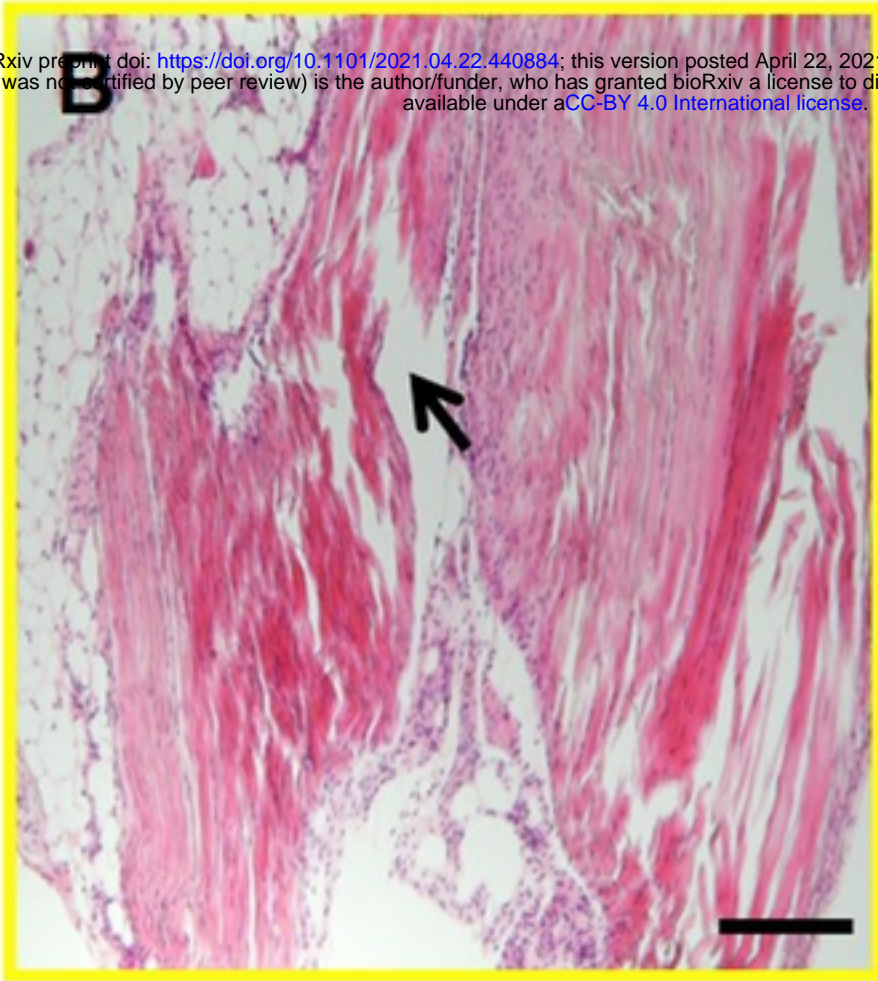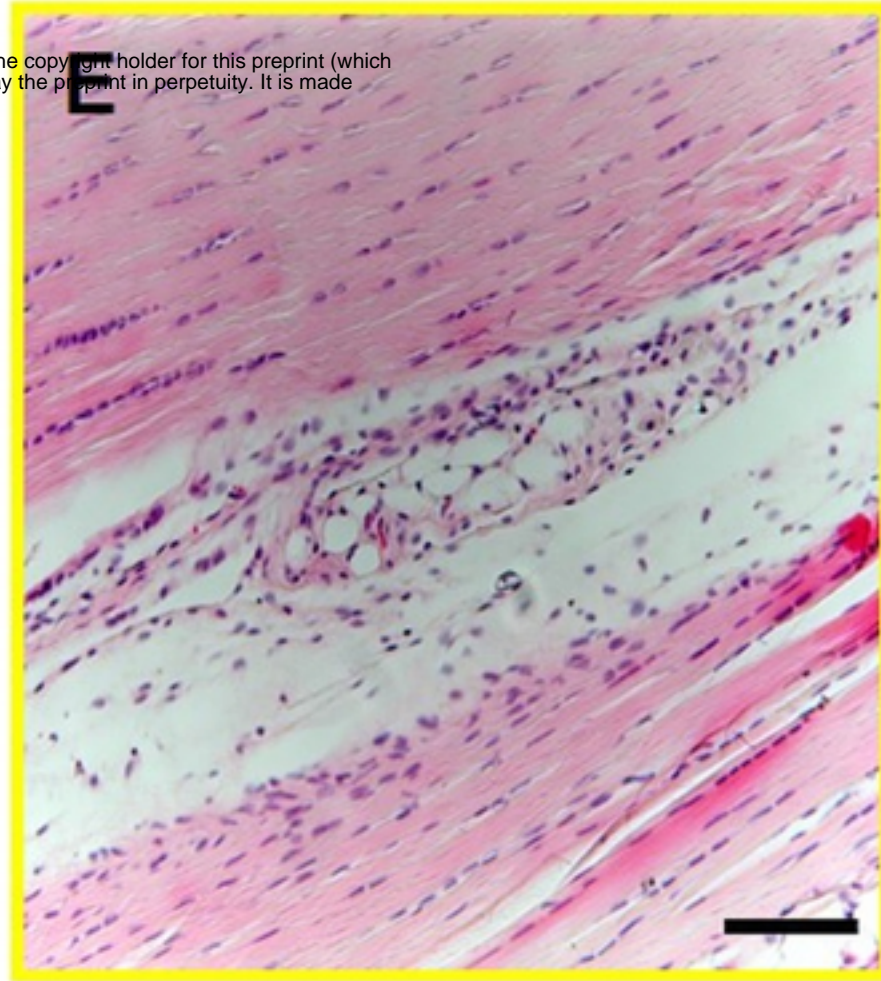**GFP-PRP**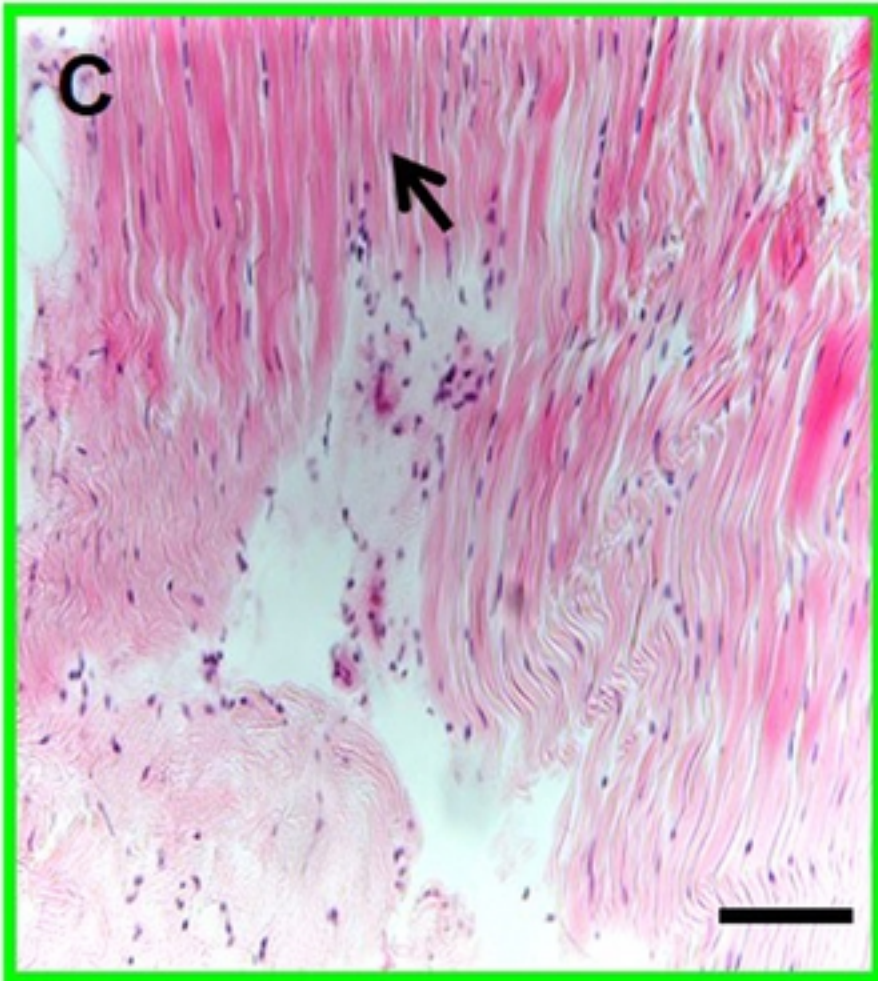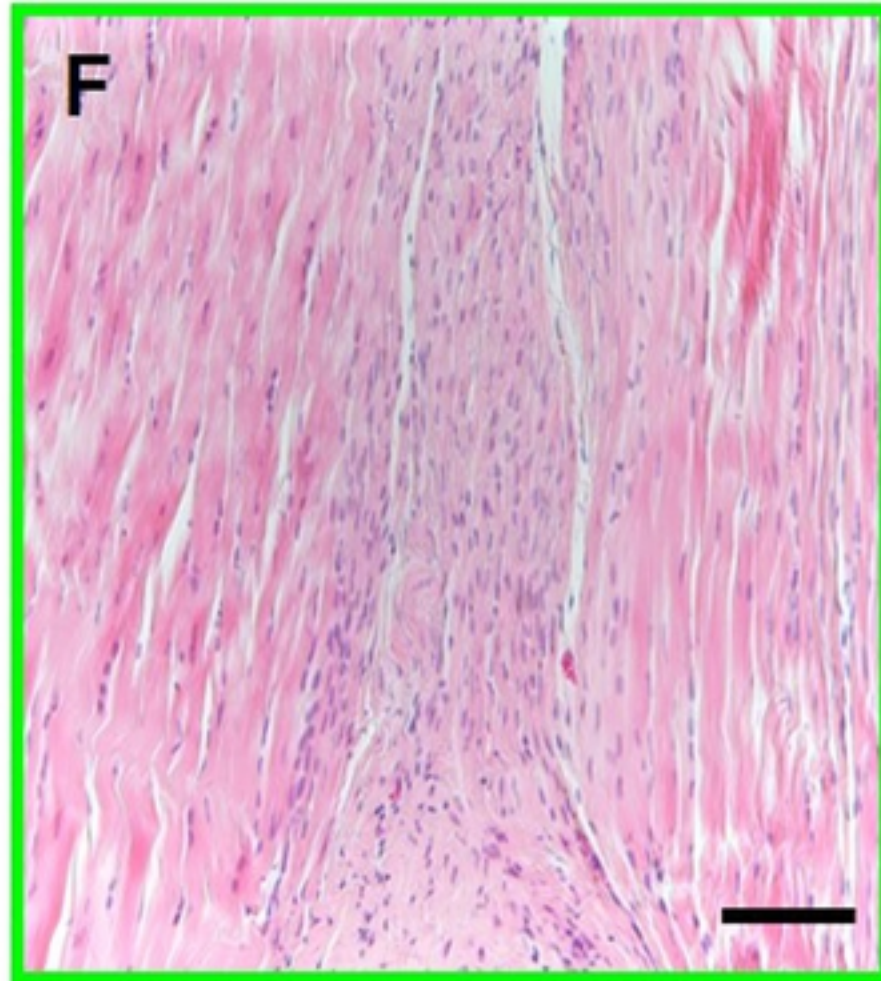**Fig3**
